# Supplementary material for: Novel Tyrosine Kinase Inhibitors to Target Chronic Myeloid Leukemia
Source: Molecules. 2022 May 18;27(10):3220. doi: 10.3390/molecules27103220 (PMC9143943; doi:10.3390/molecules27103220)
Supplement: Supplementary file 1 [file molecules-27-03220-s001.zip › molecules-1668367 SI.pdf]

## Supporting Information

### Tyrosine kinase inhibitors to target chronic myeloid leukemia

Valeria Ciaffaglione <sup>a,\*</sup>, Valeria Consoli <sup>a,1</sup>, Sebastiano Intagliata <sup>a</sup>, Agostino Marrazzo <sup>a</sup>, Giuseppe Romeo <sup>a</sup>, Valeria Pittalà <sup>a</sup>, Khaled Greish <sup>b</sup>, Luca Vanella <sup>a</sup>, Giuseppe Floresta <sup>c</sup>, Antonio Rescifina <sup>a</sup>, Loredana Salerno <sup>a,\*</sup>, Valeria Sorrenti <sup>a</sup>

<sup>a</sup> Department of Drug and Health Sciences, University of Catania, Catania – Italy

<sup>b</sup> Department of Molecular Medicine, College of Medicine and Medical Sciences, Princess Al-Jawhara Centre for Molecular Medicine, Arabian Gulf University, Manama, Kingdom of Bahrain

<sup>c</sup> Department of Analytical, Environmental and Forensic Sciences, King's College London, London, UK

|                                                                                               |                |
|-----------------------------------------------------------------------------------------------|----------------|
| Synthesis and analytical data of intermediates <b>2a–j</b> , <b>3a–j</b> , <b>4a–j</b>        | <b>S2-S7</b>   |
| Figures S1-S20: <sup>1</sup> H and <sup>13</sup> C NMR spectra of final compounds <b>1a–j</b> | <b>S8-S17</b>  |
| Figures S21-S22: viability of K562-S and K562-R cell lines                                    | <b>S18</b>     |
| Figure S23: HO-1 expression following NIL-resistance induction                                | <b>S19</b>     |
| Figures S24-S44: calculated interactions with BCR-ABL and HO-1                                | <b>S20–S40</b> |
| References                                                                                    | <b>S41</b>     |

### *Synthesis of intermediates 2a–j, 3a–j, 4a–j*

#### *General procedure for the synthesis of bromobutoxy nitrobenzene derivatives (2a–j)*

The appropriate commercially available nitrophenol (6.8 mmol) was dissolved in acetone (9 mL); K<sub>2</sub>CO<sub>3</sub> (20 mmol) and 1,4-dibromobutane (20 mmol) were added. The reaction mixture was stirred for 45 min under microwave irradiation in a sealed vial (90 °C, 150 W, 150 Psi). The solvent was evaporated under vacuum, water was added, and the resulted aqueous layer was extracted with EtOAc (3 × 50 mL). The organic layer was dried over anhydrous Na<sub>2</sub>SO<sub>4</sub>, filtered, and concentrated. The obtained residue was purified by column chromatography using a cyclohexane/EtOAc (9:1) mixture as eluent. Analytical and spectral data are reported only for unknown compounds **2d–j**. Compounds **2a–c** were previously reported in the literature [1].

#### *1-Bromo-4-(4-bromobutoxy)-2-nitrobenzene (2d)*

Yellow oil; yield 45 %. <sup>1</sup>H NMR (200 MHz, DMSO-*d*<sub>6</sub>): δ 7.77 (d, *J* = 10 Hz, 1H, aromatic), 7.65–7.63 (m, 1H, aromatic), 7.24–7.18 (m, 1H, aromatic), 4.09 (t, *J* = 6 Hz, 2H, CH<sub>2</sub>O), 3.61 (t, *J* = 6 Hz, 2H, CH<sub>2</sub>Br), 2.02–1.77 (m, 4H, CH<sub>2</sub>CH<sub>2</sub>).

#### *2-Bromo-1-(4-bromobutoxy)-4-nitrobenzene (2e)*

Yellow solid; mp 30–32.3 °C; yield 30 %. <sup>1</sup>H NMR (200 MHz, DMSO-*d*<sub>6</sub>): δ 8.44 (s, 1H, aromatic), 8.30–8.25 (m, 1H, aromatic), 7.33 (d, *J* = 10 Hz, 1H, aromatic), 4.27 (t, *J* = 6 Hz, 2H, CH<sub>2</sub>O), 3.65 (t, *J* = 6 Hz, 2H, CH<sub>2</sub>Br), 2.06–1.88 (m, 4H, CH<sub>2</sub>CH<sub>2</sub>).

#### *1-Bromo-2-(4-bromobutoxy)-4-nitrobenzene (2f)*

Yellow oil; yield 60 %. <sup>1</sup>H NMR (200 MHz, DMSO-*d*<sub>6</sub>): δ 7.94–7.74 (m, 3H, aromatic), 4.26 (t, *J* = 6 Hz, 2H, CH<sub>2</sub>O), 3.65 (t, *J* = 6 Hz, 2H, CH<sub>2</sub>Br), 2.06–1.88 (m, 4H, CH<sub>2</sub>CH<sub>2</sub>).

#### *1-Bromo-3-(4-bromobutoxy)-5-nitrobenzene (2g)*

Orange oil; yield 60 %. <sup>1</sup>H NMR (200 MHz, DMSO-*d*<sub>6</sub>): δ 7.96–7.94 (m, 1H, aromatic), 7.74–7.67 (m, 2H, aromatic), 4.17 (t, *J* = 6 Hz, 2H, CH<sub>2</sub>O), 3.63 (t, *J* = 6 Hz, 2H, CH<sub>2</sub>Br), 2.01–1.82 (m, 4H, CH<sub>2</sub>CH<sub>2</sub>).

#### *1-(4-Bromobutoxy)-3-nitro-5-(trifluoromethyl)benzene (2h)*

Yellow oil; yield 40 %. <sup>1</sup>H NMR (200 MHz, DMSO-*d*<sub>6</sub>): δ 8.27–8.01 (m, 2H, aromatic), 7.79 (s, 1H, aromatic), 4.25 (t, *J* = 6 Hz, 2H, CH<sub>2</sub>O), 3.64 (t, *J* = 6 Hz, 2H, CH<sub>2</sub>Br), 2.03–1.85 (m, 4H, CH<sub>2</sub>CH<sub>2</sub>).

*4-Bromo-2-(4-bromobutoxy)-1-nitrobenzene (2i)*

Orange solid; mp 54.5–57.4 °C; yield 64.5 %. <sup>1</sup>H NMR (200 MHz, DMSO-*d*<sub>6</sub>): δ 7.86 (d, *J* = 8 Hz, 1H, aromatic), 7.62 (s, 1H, aromatic), 7.36–7.31 (m, 1H, aromatic), 4.24 (t, *J* = 8 Hz, 2H, CH<sub>2</sub>O), 3.62 (t, *J* = 8 Hz, 2H, CH<sub>2</sub>Br), 2.00–1.81 (m, 4H, CH<sub>2</sub>CH<sub>2</sub>).

*1-(4-Bromobutoxy)-4-methyl-2-nitrobenzene (2j)*

Yellow oil; yield 30 %. <sup>1</sup>H NMR (200 MHz, DMSO-*d*<sub>6</sub>): δ 7.69 (s, 1H, aromatic), 7.49–7.43 (m, 1H, aromatic), 7.27–7.23 (m, 1H, aromatic), 4.15 (t, *J* = 6 Hz, 2H, CH<sub>2</sub>O), 3.61 (t, *J* = 6 Hz, 2H, CH<sub>2</sub>Br), 2.30 (s, 3H, CH<sub>3</sub>), 2.03–1.76 (m, 4H, CH<sub>2</sub>CH<sub>2</sub>).

*General procedure for the synthesis of nitrophenoxybutyl-1H-imidazole derivatives (3a–j)*

To a suspension of NaH (7.34 mmol) in THF (20 mL), 1*H*-imidazole (7.34 mmol) was added. After the disappearance of effervescence, the appropriate bromobutoxy nitrobenzene derivative **2a–j** (3.67 mmol) was added. The reaction mixture was left stirring for 24 h. The solvent was evaporated under vacuum, and the residue was suspended in NaOH 0.1 N aqueous solution (100 mL). The aqueous layer was extracted with EtOAc (2 × 50 mL) and the organic layer washed with brine. The organic layer was dried over anhydrous Na<sub>2</sub>SO<sub>4</sub>, filtered and concentrated. The obtained residue was purified by flash chromatography using an EtOAc/methanol (9.5:0.5) mixture as eluent. Analytical and spectral data are reported only for unknown compounds **3b–j**. Compound **3a** was previously reported in the literature [2].

*1-(4-(3-Nitrophenoxy)butyl)-1H-imidazole (3b)*

Yellow oil; yield 20 %. <sup>1</sup>H NMR (200 MHz, DMSO-*d*<sub>6</sub>): δ 7.84–7.83 (m, 1H, imidazole), 7.71–7.53 (m, 3H, aromatic), 7.44–7.38 (m, 1H, aromatic), 7.21 (s, 1H, imidazole), 6.90 (s, 1H, imidazole), 4.14–4.01 (m, 4H, CH<sub>2</sub>N, CH<sub>2</sub>O), 1.95–1.80 (m, 2H, O-CH<sub>2</sub>-CH<sub>2</sub>-CH<sub>2</sub>-CH<sub>2</sub>-N), 1.73–1.60 (m, 2H, O-CH<sub>2</sub>-CH<sub>2</sub>-CH<sub>2</sub>-CH<sub>2</sub>-N).

*1-(4-(2-Nitrophenoxy)butyl)-1H-imidazole (3c)*

Yellow oil; yield 20.7 %. <sup>1</sup>H NMR (200 MHz, DMSO-*d*<sub>6</sub>): δ 7.89–7.84 (m, 1H, aromatic), 7.69–7.60 (m, 2H, aromatic), 7.34 (d, *J* = 8 Hz, 1H, imidazole), 7.17–7.07 (m, 1H + 1H, aromatic + imidazole), 6.89 (s, 1H, imidazole), 4.16 (t, *J* = 6 Hz, 2H, CH<sub>2</sub>O), 4.03 (t, *J* = 6 Hz, 2H, CH<sub>2</sub>N), 1.94–1.79 (m, 2H, O-CH<sub>2</sub>-CH<sub>2</sub>-CH<sub>2</sub>-CH<sub>2</sub>-N), 1.71–1.58 (m, 2H, O-CH<sub>2</sub>-CH<sub>2</sub>-CH<sub>2</sub>-CH<sub>2</sub>-N).

*1-(4-(4-Bromo-3-nitrophenoxy)butyl)-1H-imidazole (3d)*

Yellow oil; yield 80 %. <sup>1</sup>H NMR (200 MHz, DMSO-*d*<sub>6</sub>): δ 7.77 (d, *J* = 8 Hz, 1H, imidazole), 7.65–7.62 (m, 2H, aromatic), 7.22–7.16 (m, 1H + 1H, aromatic + imidazole), 6.89 (s, 1H, imidazole), 4.09–3.99 (m, 4H, CH<sub>2</sub>N, CH<sub>2</sub>O), 1.92–1.78 (m, 2H, O-CH<sub>2</sub>-CH<sub>2</sub>-CH<sub>2</sub>-CH<sub>2</sub>-N), 1.71–1.61 (m, 2H, O-CH<sub>2</sub>-CH<sub>2</sub>-CH<sub>2</sub>-CH<sub>2</sub>-N).

*1-(4-(2-Bromo-4-nitrophenoxy)butyl)-1H-imidazole (3e)*

Yellow oil; yield 23.3 %. <sup>1</sup>H NMR (200 MHz, DMSO-*d*<sub>6</sub>): δ 8.44 (s, 1H, aromatic), 8.30–8.24 (m, 1H, imidazole), 7.66 (s, 1H, aromatic), 7.33–7.20 (m, 1H + 1H, aromatic + imidazole), 6.90 (s, 1H, imidazole), 4.23 (t, *J* = 5 Hz, 2H, CH<sub>2</sub>O), 4.07 (t, *J* = 6 Hz, 2H, CH<sub>2</sub>N), 1.98–1.84 (m, 2H, O-CH<sub>2</sub>-CH<sub>2</sub>-CH<sub>2</sub>-CH<sub>2</sub>-N), 1.77–1.67 (m, 2H, O-CH<sub>2</sub>-CH<sub>2</sub>-CH<sub>2</sub>-CH<sub>2</sub>-N).

*1-(4-(2-Bromo-5-nitrophenoxy)butyl)-1H-imidazole (3f)*

Yellow solid; mp 112.8–115.7 °C; yield 75 %. <sup>1</sup>H NMR (200 MHz, DMSO-*d*<sub>6</sub>): δ 7.93–7.89 (m, 1H, imidazole), 7.82–7.73 (m, 2H, aromatic), 7.66 (s, 1H, aromatic), 7.20 (s, 1H, aromatic), 6.90 (s, 1H, imidazole), 4.22 (t, *J* = 6 Hz, 2H, CH<sub>2</sub>O), 4.06 (t, *J* = 6 Hz, 2H, CH<sub>2</sub>N), 1.98–1.85 (m, 2H, O-CH<sub>2</sub>-CH<sub>2</sub>-CH<sub>2</sub>-CH<sub>2</sub>-N), 1.77–1.67 (m, 2H, O-CH<sub>2</sub>-CH<sub>2</sub>-CH<sub>2</sub>-CH<sub>2</sub>-N).

*1-(4-(3-Bromo-5-nitrophenoxy)butyl)-1H-imidazole (3g)*

Brown oil; yield 62.5 %. <sup>1</sup>H NMR (200 MHz, DMSO-*d*<sub>6</sub>): δ 7.96–7.94 (m, 1H, aromatic), 7.73–7.65 (m, 2H + 1H, aromatic + imidazole), 7.20–7.19 (m, 1H, imidazole), 6.89 (s, 1H, imidazole), 4.16–4.00 (m, 4H, CH<sub>2</sub>N, CH<sub>2</sub>O), 1.93–1.79 (m, 2H, O-CH<sub>2</sub>-CH<sub>2</sub>-CH<sub>2</sub>-CH<sub>2</sub>-N), 1.72–1.59 (m, 2H, O-CH<sub>2</sub>-CH<sub>2</sub>-CH<sub>2</sub>-CH<sub>2</sub>-N).

*1-(4-(3-Nitro-5-(trifluoromethyl)phenoxy)butyl)-1H-imidazole (3h)*

White solid; mp 73.7–77.6 °C; yield 93 %. <sup>1</sup>H NMR (200 MHz, DMSO-*d*<sub>6</sub>): δ 8.05–8.00 (m, 1H + 1H, aromatic + imidazole), 7.77 (s, 1H, aromatic), 7.67 (s, 1H, aromatic), 7.21 (s, 1H, imidazole), 6.90 (s, 1H, imidazole), 4.21 (t, *J* = 6 Hz, 2H, CH<sub>2</sub>O), 4.05 (t, *J* = 6 Hz, 2H, CH<sub>2</sub>N), 1.92–1.85 (m, 2H, O-CH<sub>2</sub>-CH<sub>2</sub>-CH<sub>2</sub>-CH<sub>2</sub>-N), 1.72–1.65 (m, 2H, O-CH<sub>2</sub>-CH<sub>2</sub>-CH<sub>2</sub>-CH<sub>2</sub>-N).

*1-(4-(5-Bromo-2-nitrophenoxy)butyl)-1H-imidazole (3i)*

Yellow solid; mp 91.6–95.3 °C; yield 78 %. <sup>1</sup>H NMR (200 MHz, DMSO-*d*<sub>6</sub>): δ 7.86 (d, *J* = 10 Hz, 1H, imidazole), 7.64–7.60 (m, 2H, aromatic), 7.36–7.30 (m, 1H, aromatic), 7.17 (s, 1H, imidazole), 6.89 (s, 1H, imidazole), 4.20 (t, *J* = 6 Hz, 2H, CH<sub>2</sub>O), 4.03 (t, *J* = 6 Hz, 2H, CH<sub>2</sub>N), 1.89–1.78 (m, 2H, O-CH<sub>2</sub>-CH<sub>2</sub>-CH<sub>2</sub>-CH<sub>2</sub>-N), 1.70–1.60 (m, 2H, O-CH<sub>2</sub>-CH<sub>2</sub>-CH<sub>2</sub>-CH<sub>2</sub>-N).

*1-(4-(4-Methyl-2-nitrophenoxy)butyl)-1H-imidazole (3j)*

Yellow solid; mp 70.2–74.5 °C; yield 86 %. <sup>1</sup>H NMR (200 MHz, DMSO-*d*<sub>6</sub>): δ 7.69–7.63 (m, 1H + 1H, aromatic + imidazole), 7.48–7.43 (m, 1H, aromatic), 7.25–7.16 (m, 1H + 1H, aromatic + imidazole), 6.89 (s, 1H, imidazole), 4.15–3.99 (m, 4H, CH<sub>2</sub>N, CH<sub>2</sub>O), 2.30 (s, 3H, CH<sub>3</sub>), 1.93–1.78 (m, 2H, O-CH<sub>2</sub>-CH<sub>2</sub>-CH<sub>2</sub>-CH<sub>2</sub>-N), 1.70–1.56 (m, 2H, O-CH<sub>2</sub>-CH<sub>2</sub>-CH<sub>2</sub>-CH<sub>2</sub>-N).

*General procedure for the synthesis of (1H-imidazol-1-yl)butoxy aniline derivatives (4a–j)*

To a solution of the appropriate nitrophenoxybutyl-1H-imidazole derivative (**3a–j**) (1.24 mmol) in methanol/water (1:1, 20 mL), iron powder (8.68 mmol) and NH<sub>4</sub>Cl (8.68 mmol) were added. The reaction mixture was left stirring at 65 °C for 3 hours. After cooling, the mixture was filtered using a Celite pad. The solvent was evaporated under vacuum, and NaHCO<sub>3</sub> aqueous solution (100 mL) was added. The aqueous layer was extracted with EtOAc (3 × 50 mL), and the organic layer was washed with brine. The organic layer was dried over anhydrous Na<sub>2</sub>SO<sub>4</sub>, filtered, and concentrated to afford the amine.

*4-(4-(1H-Imidazol-1-yl)butoxy)aniline (4a)*

Brown oil; yield 92 %. <sup>1</sup>H NMR (200 MHz, DMSO-*d*<sub>6</sub>): δ 7.63 (s, 1H, imidazole), 7.18 (s, 1H, aromatic), 6.88 (s, 1H, imidazole), 6.66–6.59 (m, 1H + 1H, aromatic + imidazole), 6.52–6.46 (m, 2H, aromatic), 4.60 (s, 2H, NH<sub>2</sub>), 4.00 (t, *J* = 6 Hz, 2H, CH<sub>2</sub>O), 3.80 (t, *J* = 6 Hz,

2H, CH<sub>2</sub>N), 1.89–1.75 (m, 2H, O-CH<sub>2</sub>-CH<sub>2</sub>-CH<sub>2</sub>-CH<sub>2</sub>-N), 1.63–1.50 (m, 2H, O-CH<sub>2</sub>-CH<sub>2</sub>-CH<sub>2</sub>-CH<sub>2</sub>-N).

*3-(4-(1H-Imidazol-1-yl)butoxy)aniline (4b)*

Brown oil; yield 93 %. <sup>1</sup>H NMR (200 MHz, DMSO-*d*<sub>6</sub>): 7.64 (s, 1H, imidazole), 7.19 (s, 1H, imidazole), 6.91–6.83 (m, 2H, aromatic), 6.14–6.03 (m, 2H + 1H, aromatic + imidazole), 5.04 (s, 2H, NH<sub>2</sub>), 4.01 (t, *J* = 6 Hz, 2H, CH<sub>2</sub>O), 3.84 (t, *J* = 6 Hz, 2H, CH<sub>2</sub>N), 1.86–1.79 (m, 2H, O-CH<sub>2</sub>-CH<sub>2</sub>-CH<sub>2</sub>-CH<sub>2</sub>-N), 1.63–1.55 (m, 2H, O-CH<sub>2</sub>-CH<sub>2</sub>-CH<sub>2</sub>-CH<sub>2</sub>-N).

*2-(4-(1H-Imidazol-1-yl)butoxy)aniline (4c)*

Brown oil; yield 98 %. <sup>1</sup>H NMR (200 MHz, DMSO-*d*<sub>6</sub>): 7.68 (s, 1H, imidazole), 7.21 (s, 1H, aromatic), 6.90 (s, 1H, imidazole), 6.77–6.60 (m, 2H + 1H, aromatic + imidazole), 6.53–6.44 (m, 1H, aromatic), 4.06–3.89 (m, 4H, CH<sub>2</sub>N, CH<sub>2</sub>O), 1.97–1.82 (m, 2H, O-CH<sub>2</sub>-CH<sub>2</sub>-CH<sub>2</sub>-CH<sub>2</sub>-N), 1.71–1.58 (m, 2H, O-CH<sub>2</sub>-CH<sub>2</sub>-CH<sub>2</sub>-CH<sub>2</sub>-N).

*5-(4-(1H-Imidazol-1-yl)butoxy)-2-bromoaniline (4d)*

Yellow oil; yield 87 %. <sup>1</sup>H NMR (200 MHz, DMSO-*d*<sub>6</sub>): δ 7.64 (s, 1H, aromatic), 7.19–7.15 (m, 2H, aromatic), 6.89 (s, 1H, imidazole), 6.36 (d, *J* = 2 Hz, 1H, imidazole), 6.11–6.06 (m, 1H, imidazole), 5.26 (s, 2H, NH<sub>2</sub>), 4.01 (t, *J* = 6 Hz, 2H, CH<sub>2</sub>O), 3.85 (t, *J* = 6 Hz, 2H, CH<sub>2</sub>N), 1.86–1.75 (m, 2H, O-CH<sub>2</sub>-CH<sub>2</sub>-CH<sub>2</sub>-CH<sub>2</sub>-N), 1.66–1.56 (m, 2H, O-CH<sub>2</sub>-CH<sub>2</sub>-CH<sub>2</sub>-CH<sub>2</sub>-N).

*4-(4-(1H-Imidazol-1-yl)butoxy)-3-bromoaniline (4e)*

Yellow oil; yield 85.5 %. <sup>1</sup>H NMR (200 MHz, DMSO-*d*<sub>6</sub>): δ 7.64 (s, 1H, imidazole), 7.18 (s, 1H, aromatic), 6.88–6.78 (m, 2H + 1H, aromatic + imidazole), 6.53–6.48 (m, 1H, imidazole), 4.92 (s, 2H, NH<sub>2</sub>), 4.03 (t, *J* = 6 Hz, 2H, CH<sub>2</sub>N), 3.86 (t, *J* = 6 Hz, 2H, CH<sub>2</sub>O), 1.94–1.90 (m, 2H, O-CH<sub>2</sub>-CH<sub>2</sub>-CH<sub>2</sub>-CH<sub>2</sub>-N), 1.66–1.52 (m, 2H, O-CH<sub>2</sub>-CH<sub>2</sub>-CH<sub>2</sub>-CH<sub>2</sub>-N).

*3-(4-(1H-Imidazol-1-yl)butoxy)-4-bromoaniline (4f)*

Brown solid; mp 104–106.5 °C; yield 94.5 %. <sup>1</sup>H NMR (200 MHz, DMSO-*d*<sub>6</sub>): δ 7.65 (s, 1H, imidazole), 7.19–7.08 (m, 1H + 1H, aromatic + imidazole), 6.90 (s, 1H, aromatic), 6.28 (s, 1H, imidazole), 6.12–6.07 (m, 1H, aromatic), 5.28 (s, 2H, NH<sub>2</sub>), 4.05 (t, *J* = 6 Hz, 2H,

CH<sub>2</sub>O), 3.91 (t, *J* = 6 Hz, 2H, CH<sub>2</sub>N), 1.95–1.81 (m, 2H, O-CH<sub>2</sub>-CH<sub>2</sub>-CH<sub>2</sub>-CH<sub>2</sub>-N), 1.70–1.60 (m, 2H, O-CH<sub>2</sub>-CH<sub>2</sub>-CH<sub>2</sub>-CH<sub>2</sub>-N).

*3-(4-(1H-Imidazol-1-yl)butoxy)-5-bromoaniline (4g)*

Brown oil; yield 92.4 %. <sup>1</sup>H NMR (200 MHz, DMSO-*d*<sub>6</sub>): δ 7.64 (s, 1H, imidazole), 7.19 (s, 1H, aromatic), 6.89 (s, 1H, imidazole), 6.32 (s, 1H, imidazole), 6.23–6.21 (m, 1H, aromatic), 6.08–6.06 (m, 1H, aromatic), 5.40 (s, 2H, NH<sub>2</sub>), 4.01 (t, *J* = 8 Hz, 2H, CH<sub>2</sub>O), 3.86 (t, *J* = 8 Hz, 2H, CH<sub>2</sub>N), 1.88–1.74 (m, 2H, O-CH<sub>2</sub>-CH<sub>2</sub>-CH<sub>2</sub>-CH<sub>2</sub>-N), 1.65–1.51 (m, 2H, O-CH<sub>2</sub>-CH<sub>2</sub>-CH<sub>2</sub>-CH<sub>2</sub>-N).

*3-(4-(1H-Imidazol-1-yl)butoxy)-5-(trifluoromethyl)aniline (4h)*

Brown oil; yield 90 %. <sup>1</sup>H NMR (200 MHz, DMSO-*d*<sub>6</sub>): δ 7.65 (s, 1H, imidazole), 7.19 (s, 1H, imidazole), 6.89 (s, 1H, imidazole), 6.44 (s, 1H, aromatic), 6.33–6.30 (s, 2H, aromatic), 5.59 (s, 2H, NH<sub>2</sub>), 4.05–3.89 (m, 4H, CH<sub>2</sub>O, CH<sub>2</sub>N), 1.88–1.80 (m, 2H, O-CH<sub>2</sub>-CH<sub>2</sub>-CH<sub>2</sub>-CH<sub>2</sub>-N), 1.65–1.57 (m, 2H, O-CH<sub>2</sub>-CH<sub>2</sub>-CH<sub>2</sub>-CH<sub>2</sub>-N).

*2-(4-(1H-Imidazol-1-yl)butoxy)-4-bromoaniline (4i)*

Brown oil; yield 90 %. <sup>1</sup>H NMR (200 MHz, DMSO-*d*<sub>6</sub>): δ 7.65 (s, 1H, imidazole), 7.20 (s, 1H, imidazole), 6.89–6.78 (m, 2H + 1H, aromatic + imidazole), 6.58–6.54 (m, 1H, aromatic), 4.88 (s, 2H, NH<sub>2</sub>), 4.05–3.91 (m, 4H, CH<sub>2</sub>O, CH<sub>2</sub>N), 1.92–1.81 (m, 2H, O-CH<sub>2</sub>-CH<sub>2</sub>-CH<sub>2</sub>-CH<sub>2</sub>-N), 1.70–1.60 (m, 2H, O-CH<sub>2</sub>-CH<sub>2</sub>-CH<sub>2</sub>-CH<sub>2</sub>-N).

*2-(4-(1H-Imidazol-1-yl)butoxy)-5-methylaniline (4j)*

Brown solid; mp 57.1–61.2 °C; yield 98 %. <sup>1</sup>H NMR (200 MHz, DMSO-*d*<sub>6</sub>): δ 7.64 (s, 1H, aromatic), 7.20 (s, 1H, imidazole), 6.89 (s, 1H, imidazole), 6.62 (d, *J* = 8 Hz, 1H, aromatic), 6.44 (s, 1H, imidazole), 6.31–6.26 (m, 1H, aromatic), 4.59 (s, 2H, NH<sub>2</sub>), 4.01 (t, *J* = 6 Hz, 2H, CH<sub>2</sub>O), 3.87 (t, *J* = 6 Hz, 2H, CH<sub>2</sub>N), 2.11 (s, 3H, CH<sub>3</sub>), 1.95–1.80 (m, 2H, O-CH<sub>2</sub>-CH<sub>2</sub>-CH<sub>2</sub>-CH<sub>2</sub>-N), 1.69–1.59 (m, 2H, O-CH<sub>2</sub>-CH<sub>2</sub>-CH<sub>2</sub>-CH<sub>2</sub>-N).

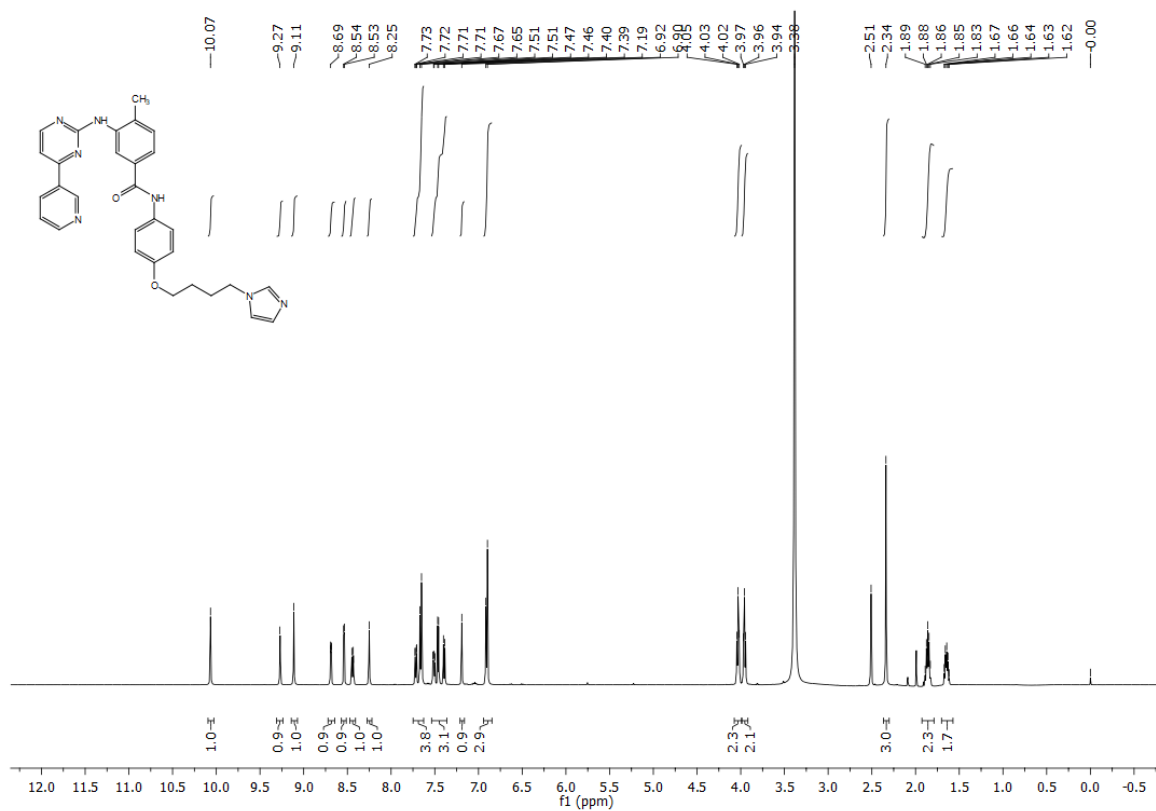

**Figure S1.** <sup>1</sup>H NMR (500 MHz, DMSO-*d*<sub>6</sub>) of compound 1a.

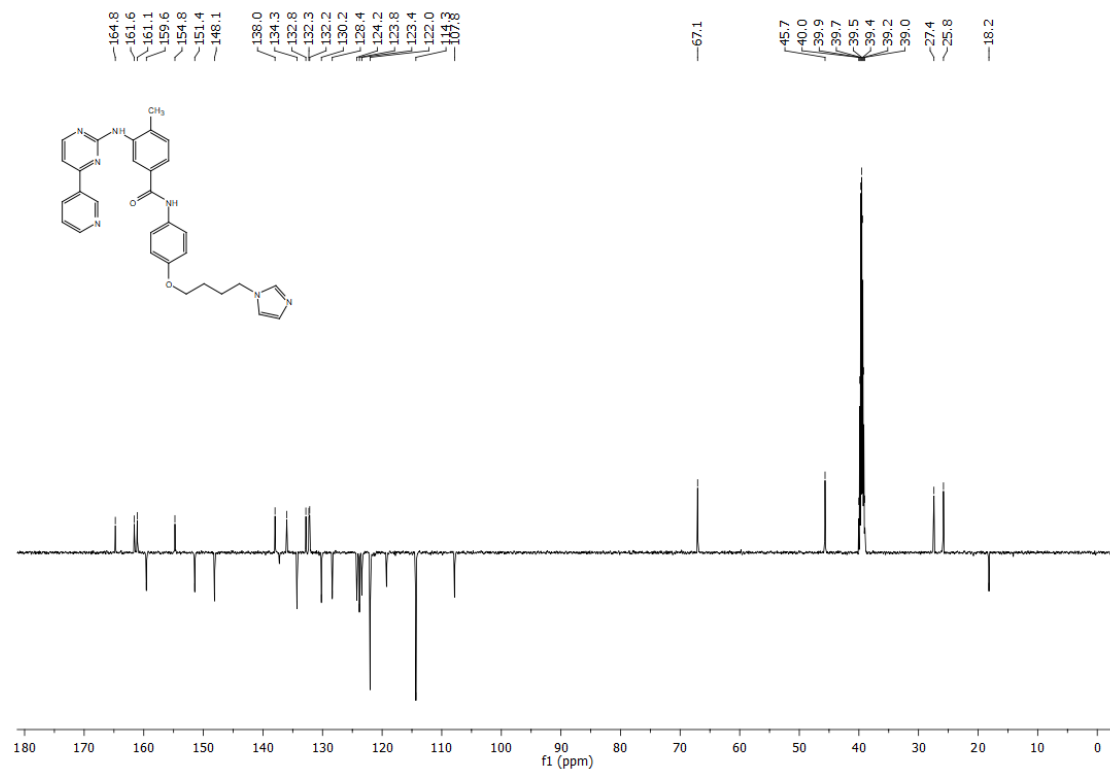

**Figure S2.** <sup>13</sup>C NMR (125 MHz, DMSO-*d*<sub>6</sub>) of compound 1a.

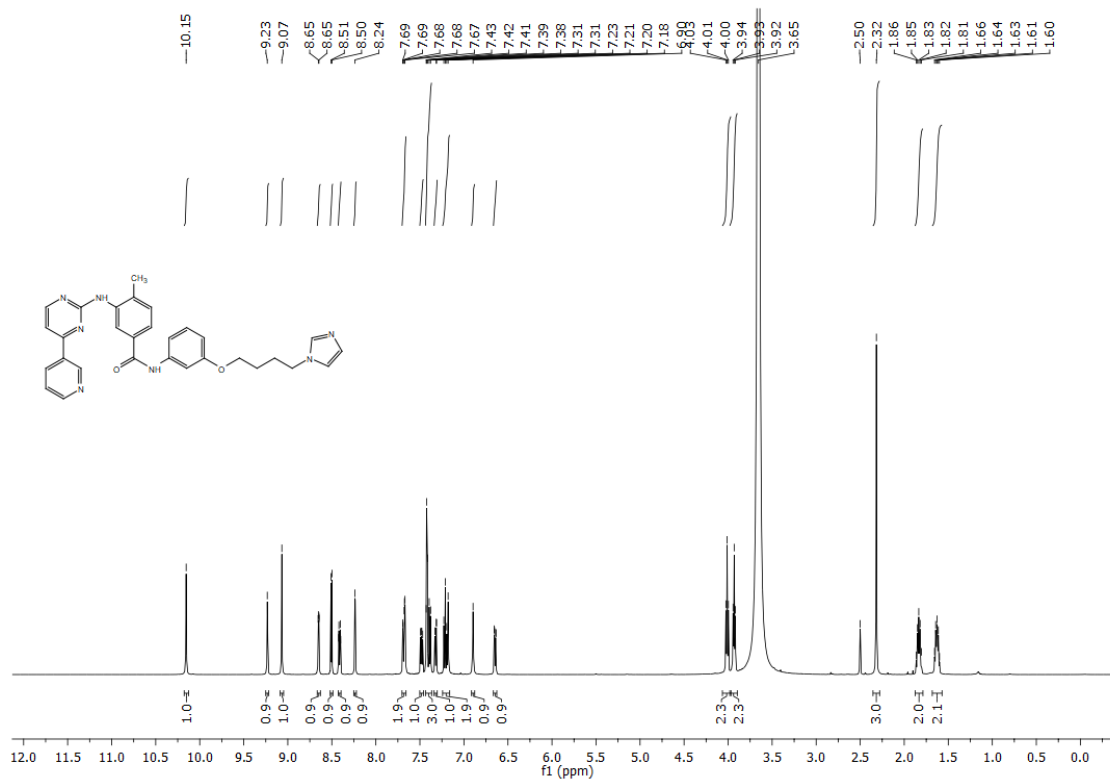

**Figure 1** <sup>1</sup>H NMR (500 MHz, DMSO-*d*<sub>6</sub>) of compound **1b**.

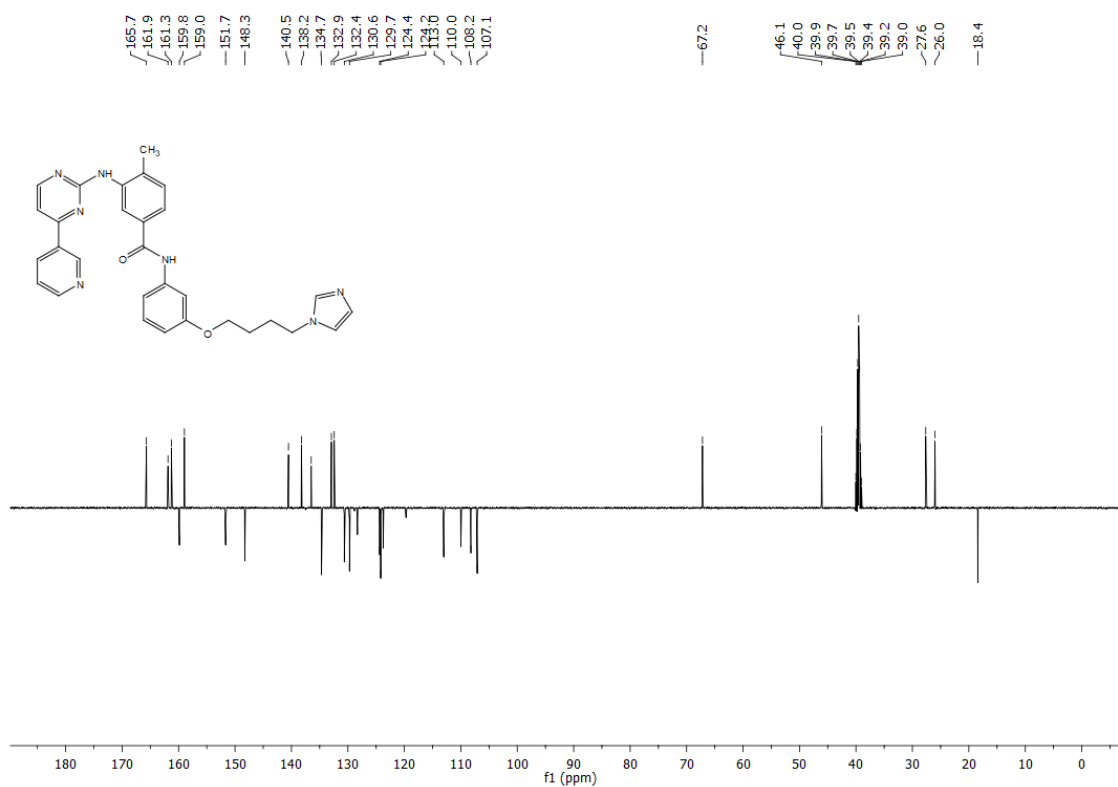

**Figure S4.** <sup>13</sup>C NMR (125 MHz, DMSO-*d*<sub>6</sub>) of compound **1b**.

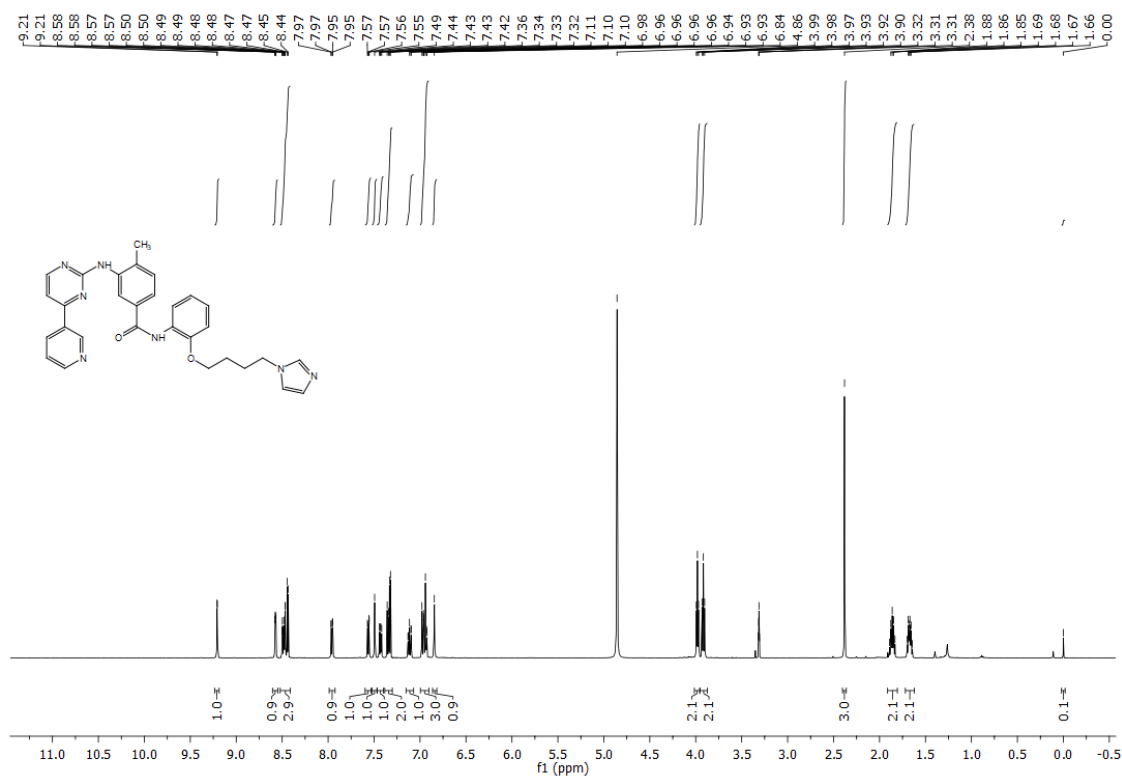

**Figure S5.** <sup>1</sup>H NMR (500 MHz, CD<sub>3</sub>OD) of compound 1c.

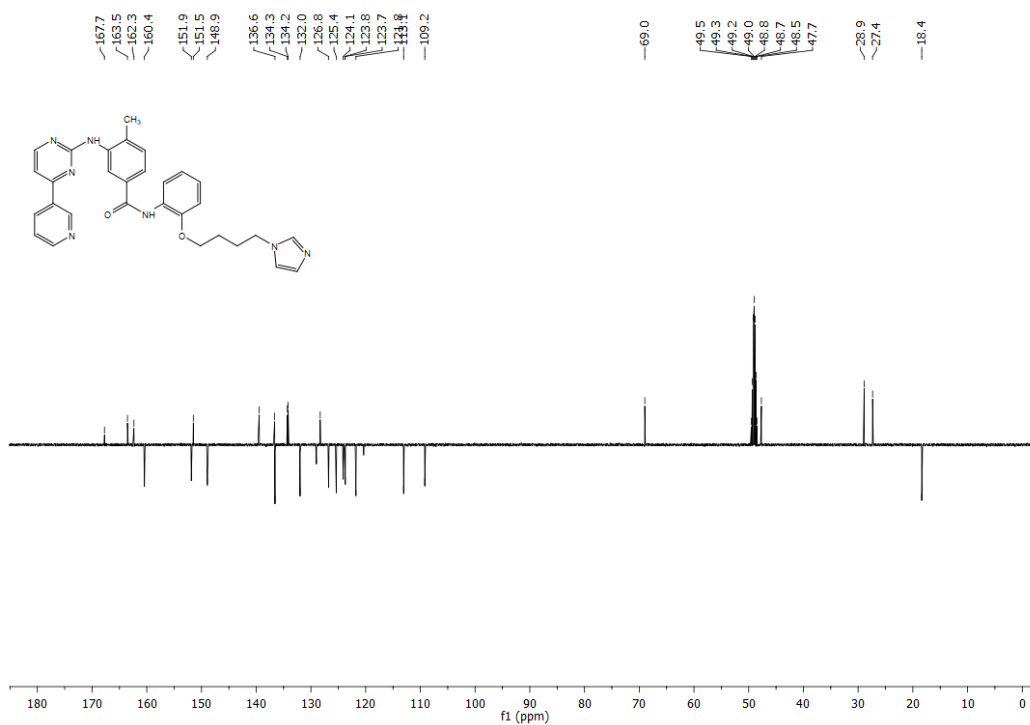

**Figure S6.** <sup>13</sup>C NMR (125 MHz, CD<sub>3</sub>OD) of compound 1c.

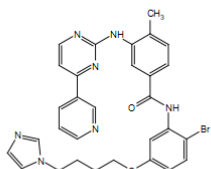

Chemical structure of the compound is shown above the spectrum. The spectrum displays peaks corresponding to the chemical structure, with the following chemical shifts (ppm) labeled above the peaks:

165.4, 163.0, 160.6, 159.2, 158.8, 151.7, 148.7, 138.3, 136.8, 134.8, 133.1, 132.6, 132.5, 131.2, 125.6, 123.9, 121.9, 119.8, 109.0, 107.4, 104.3, 77.4, 77.2, 76.9, 67.5, 48.0, 29.8, 27.9, 26.1, 18.4.

Figure S10. <sup>13</sup>C NMR spectrum of compound 10. The spectrum shows peaks corresponding to the chemical structure, with the following chemical shifts (ppm) labeled above the peaks:

165.4, 163.0, 160.6, 159.2, 158.8, 151.7, 148.7, 138.3, 136.8, 134.8, 133.1, 132.6, 132.5, 131.2, 125.6, 123.9, 121.9, 119.8, 109.0, 107.4, 104.3, 77.4, 77.2, 76.9, 67.5, 48.0, 29.8, 27.9, 26.1, 18.4.

S11

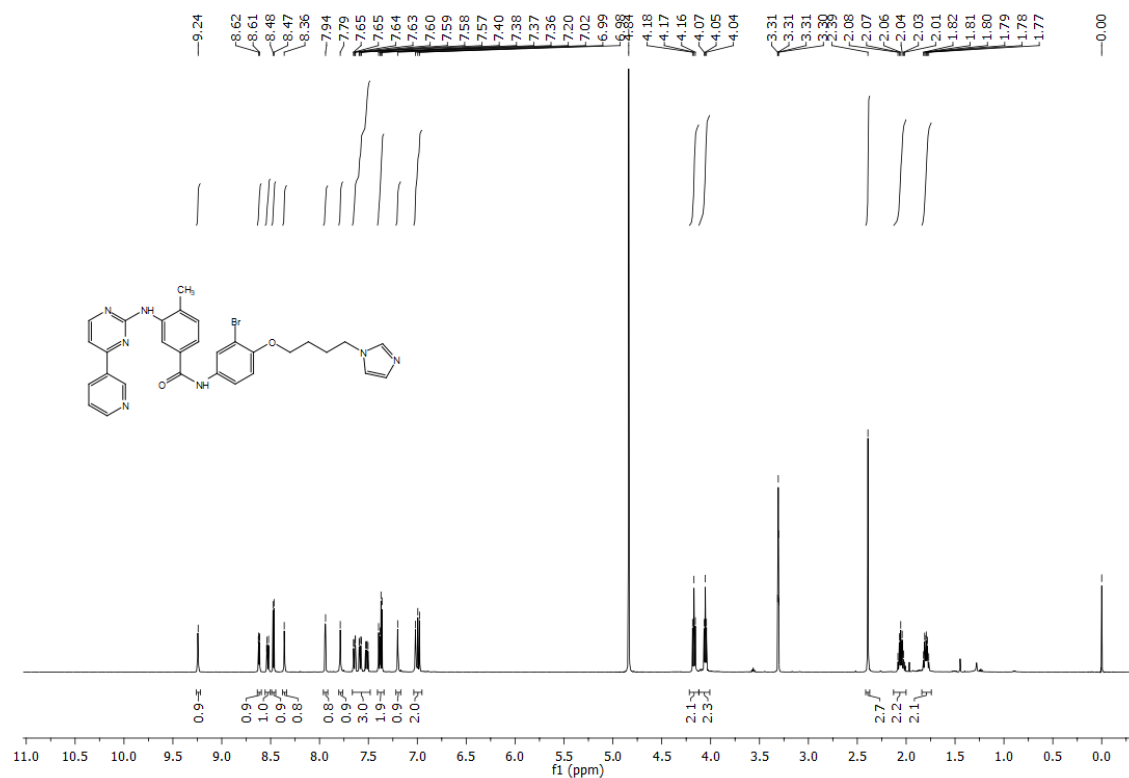

**Figure S9.** <sup>1</sup>H NMR (500 MHz, CD<sub>3</sub>OD) of compound **1e**.

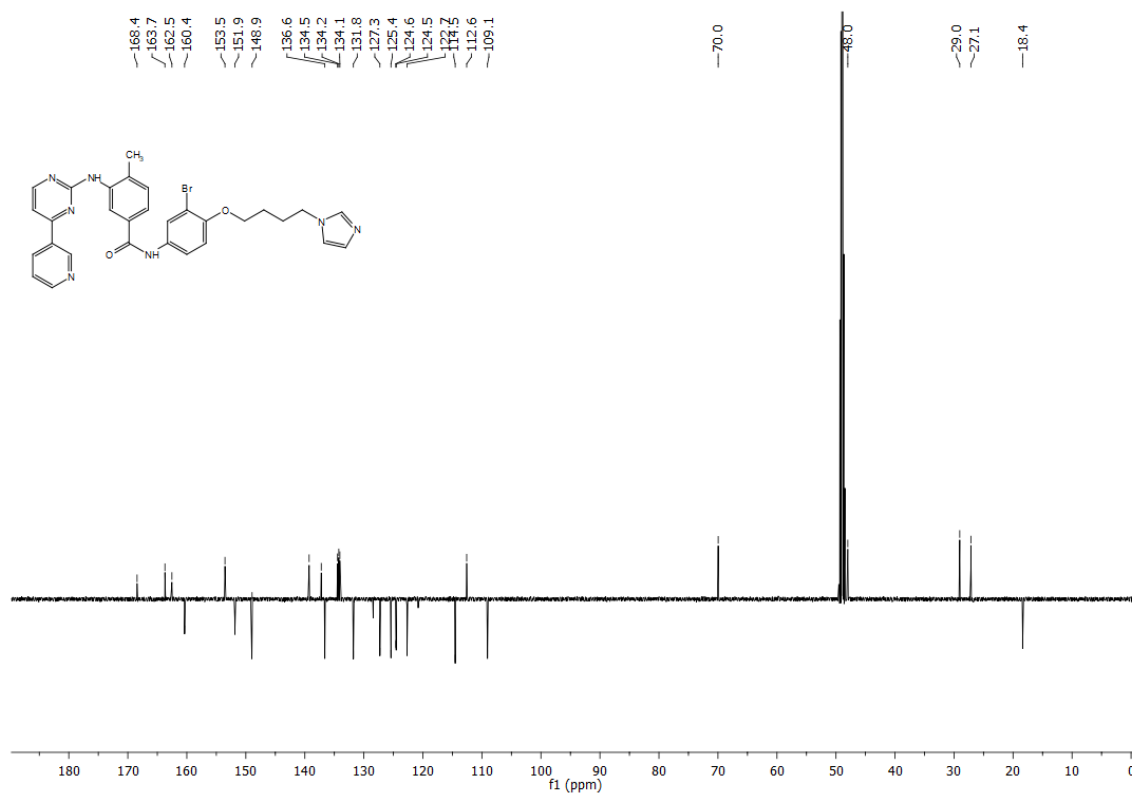

**Figure S10.** <sup>13</sup>C NMR (125 MHz, CD<sub>3</sub>OD) of compound **1e**.

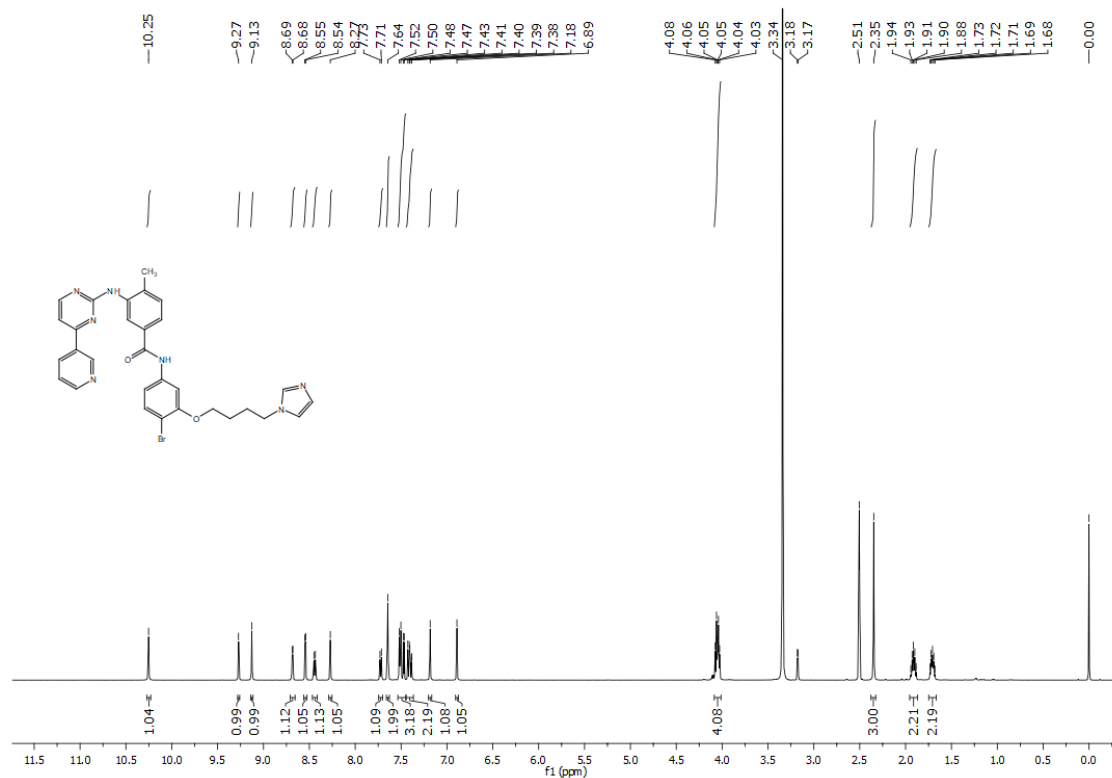

**Figure S11.** <sup>1</sup>H NMR (500 MHz, DMSO-*d*<sub>6</sub>) of compound **1f**.

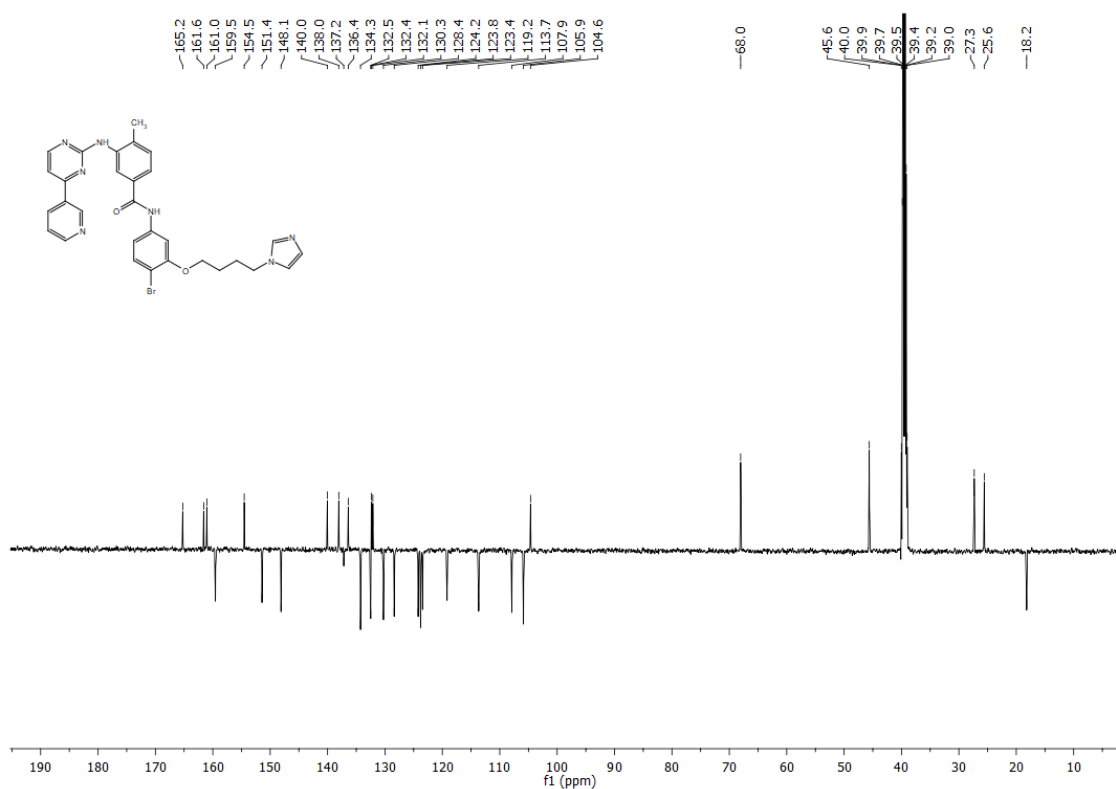

**Figure S12.** <sup>13</sup>C NMR (125 MHz, DMSO-*d*<sub>6</sub>) of compound **1f**.

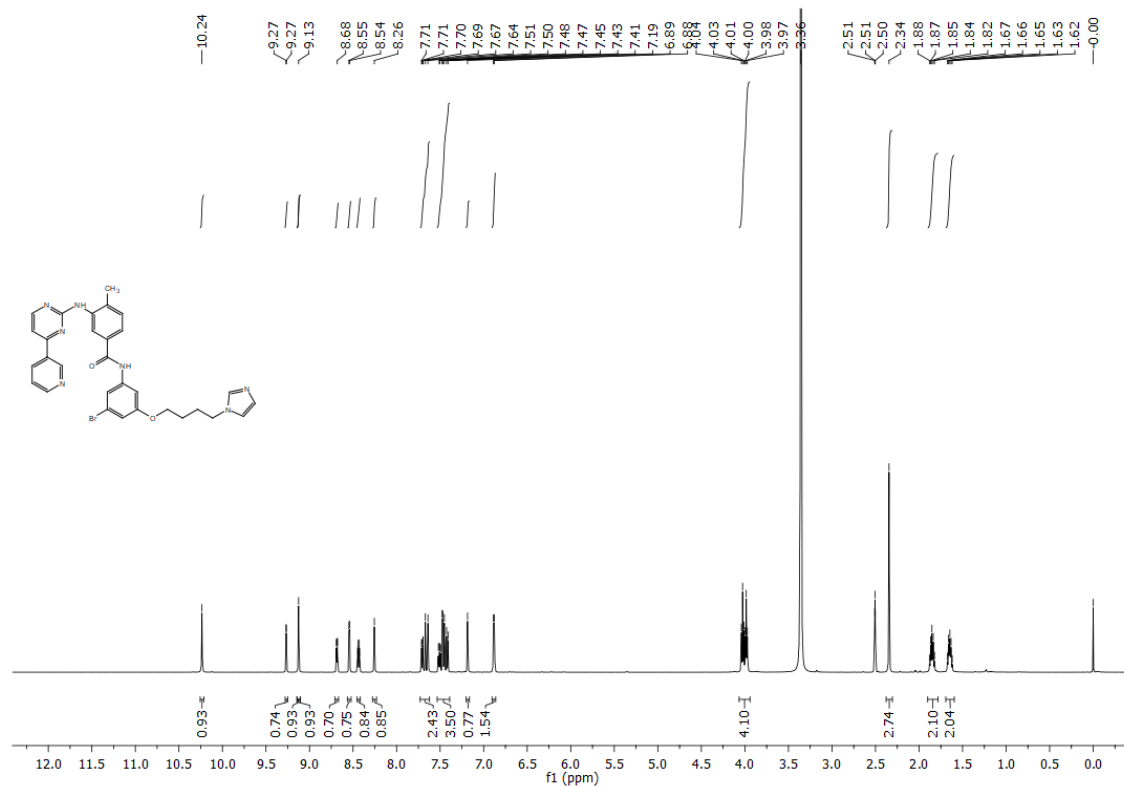

**Figure S13.** <sup>1</sup>H NMR (500 MHz, DMSO-*d*<sub>6</sub>) of compound **1g**.

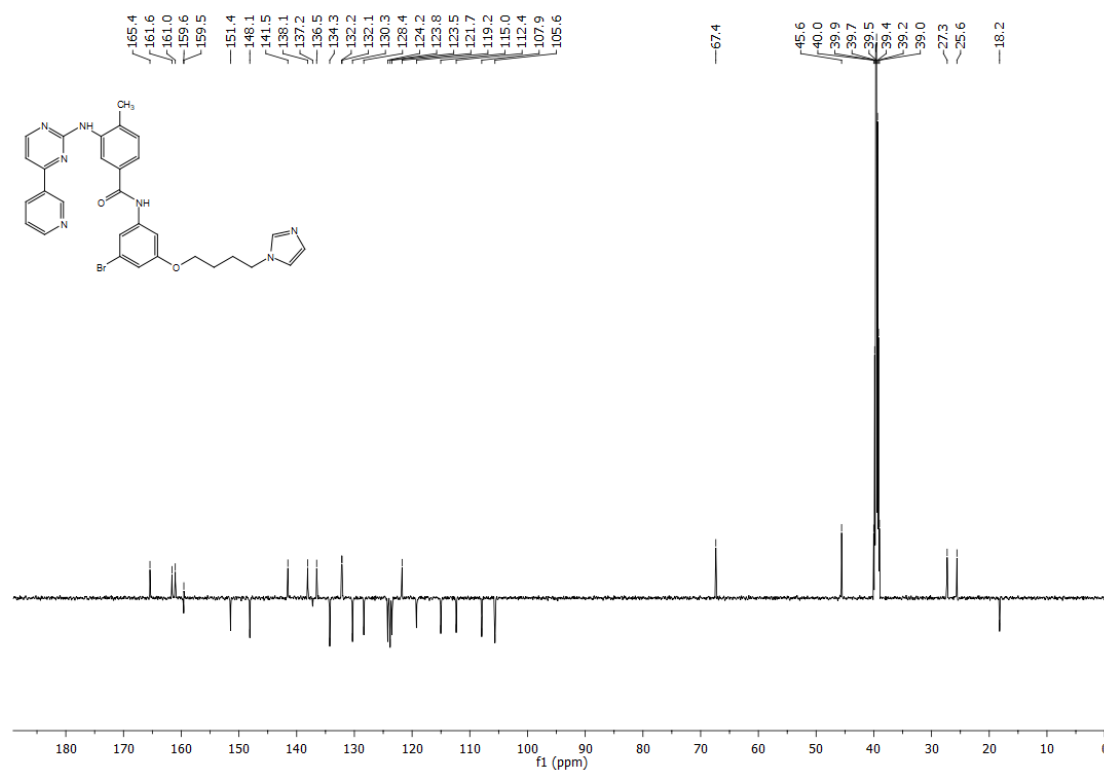

**Figure S14.** <sup>13</sup>C NMR (125 MHz, DMSO-*d*<sub>6</sub>) of compound **1g**.

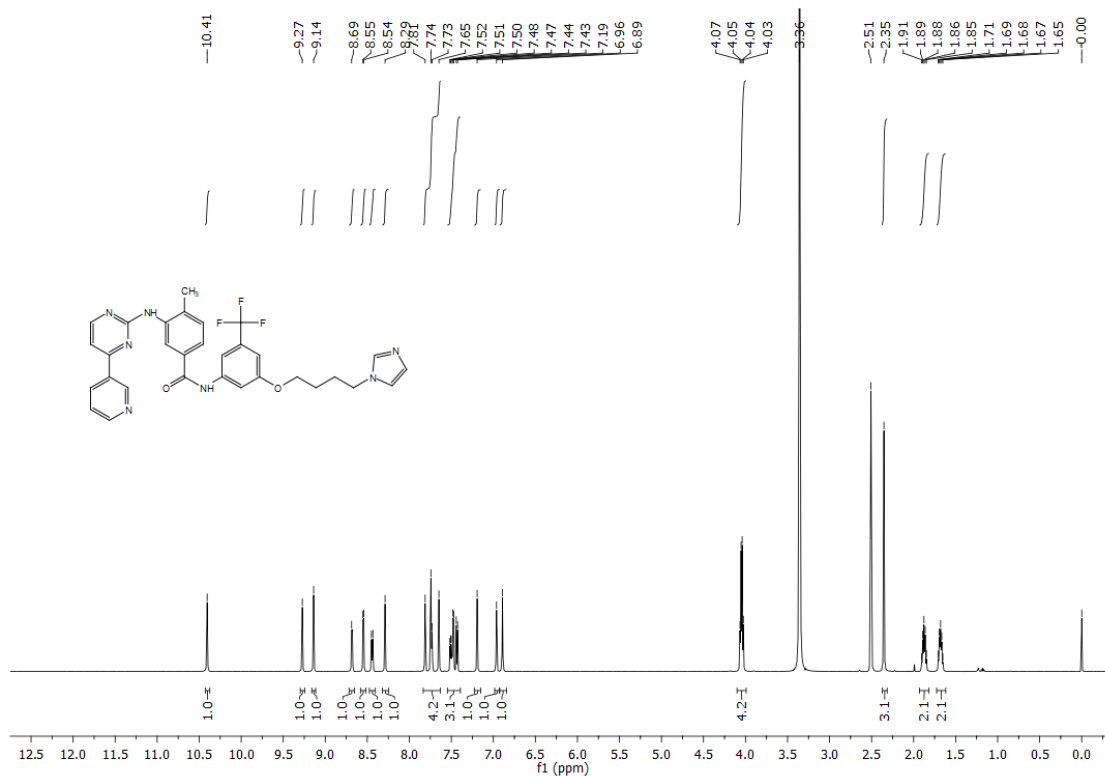

**Figure S15.** <sup>1</sup>H NMR (500 MHz, DMSO-*d*<sub>6</sub>) of compound **1h**.

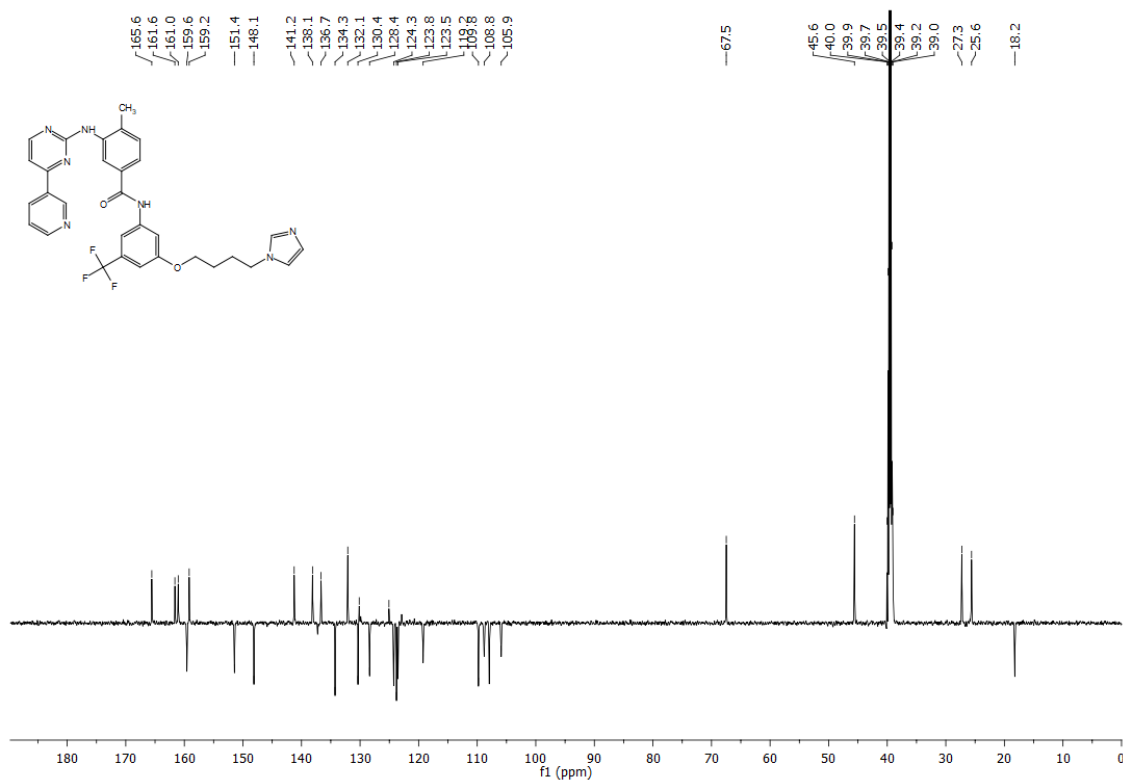

**Figure S16.** <sup>13</sup>C NMR (125 MHz, DMSO-*d*<sub>6</sub>) of compound **1h**.

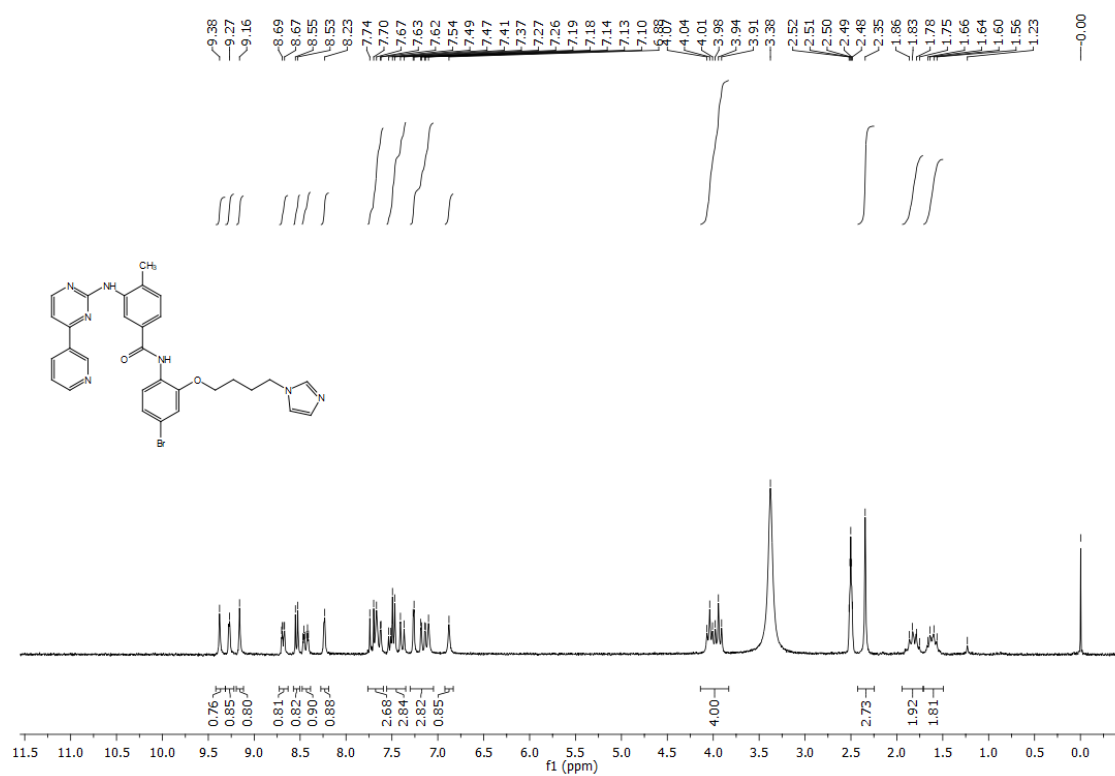

**Figure S17.** <sup>1</sup>H NMR (200 MHz, DMSO-*d*<sub>6</sub>) of compound **1i**.

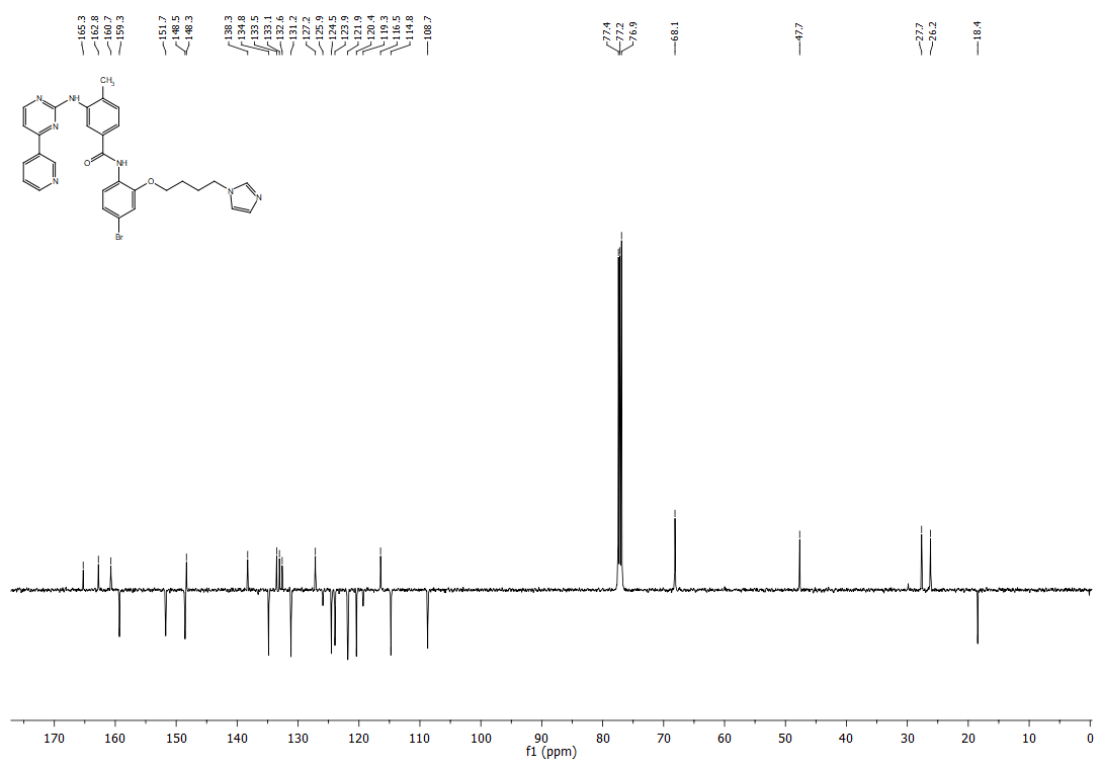

**Figure S18.** <sup>13</sup>C NMR (125 MHz, CDCl<sub>3</sub>) of compound **1i**.

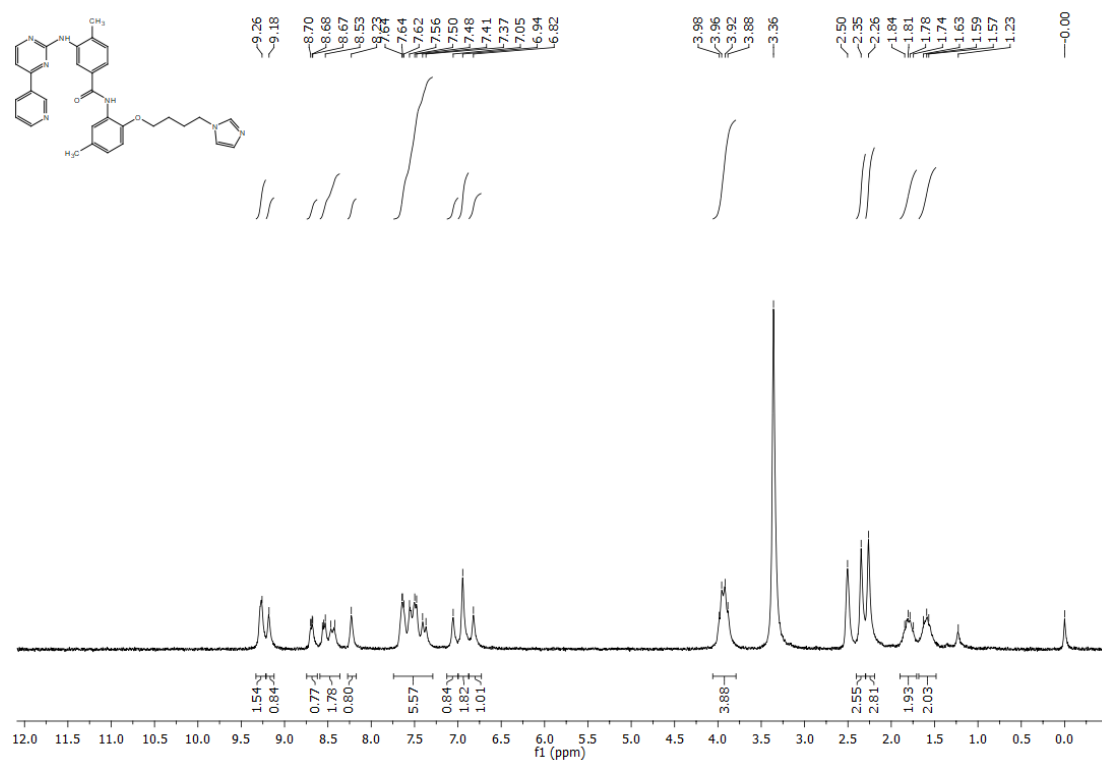

**Figure S19.** <sup>1</sup>H NMR (200 MHz, DMSO-*d*<sub>6</sub>) of compound **1j**.

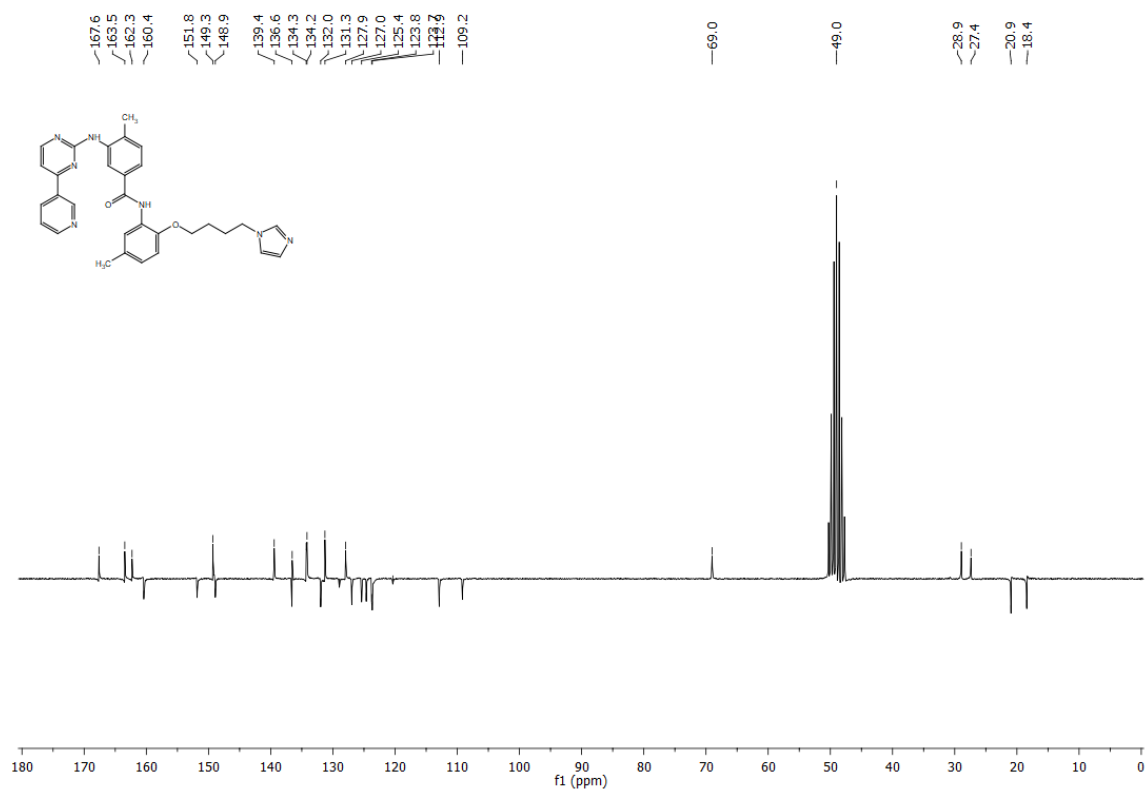

**Figure S20.** <sup>13</sup>C NMR (50 MHz, CD<sub>3</sub>OD) of compound **1j**.

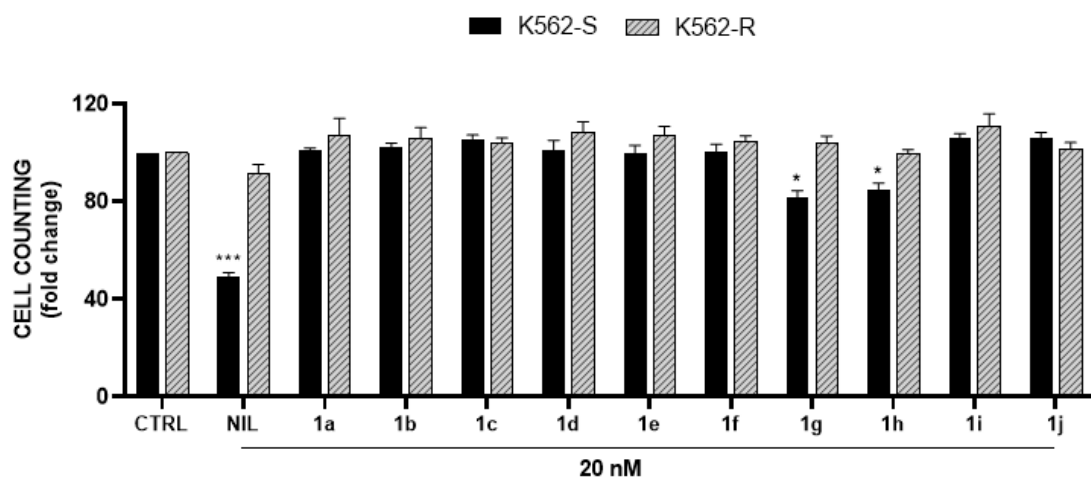

**Figure S21.** Effect of hybrids on cell counting of K562-S and K562-R cell lines at 20 nM. \*\*\* $p \leq 0,0005$  vs CTRL, \*\* $p \leq 0,005$  vs CTRL, \* $p \leq 0,05$  vs CTRL.

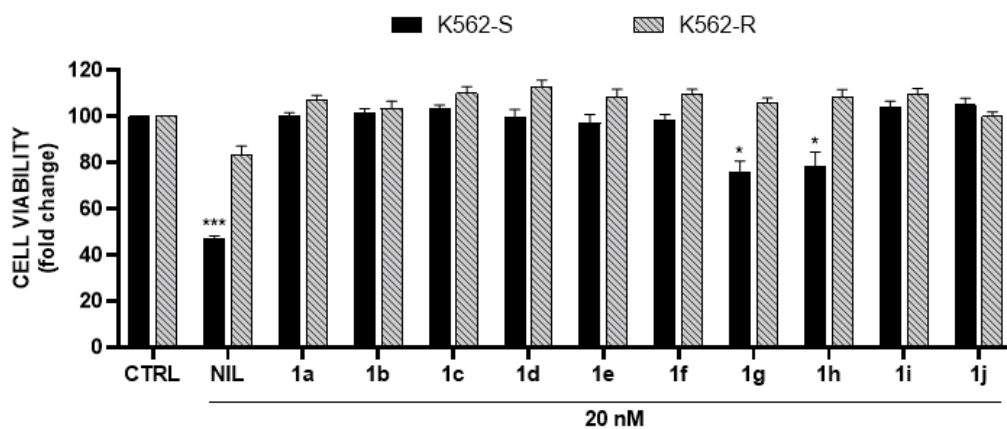

**Figure S22.** Evaluation of hybrids effect on cell viability of K562-R and K562-S. \*\*\* $p \leq 0,0005$  vs CTRL, \* $p \leq 0,05$  vs CTRL.

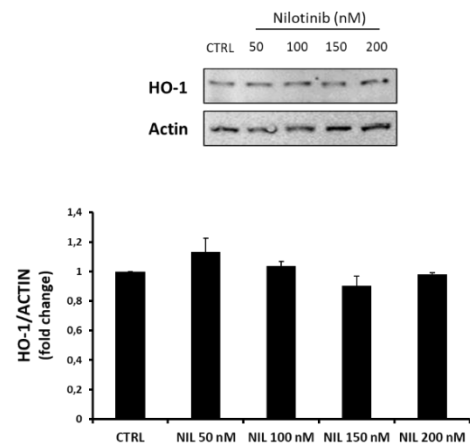

**Figure S23.** HO-1 expression following NIL-resistance induction.

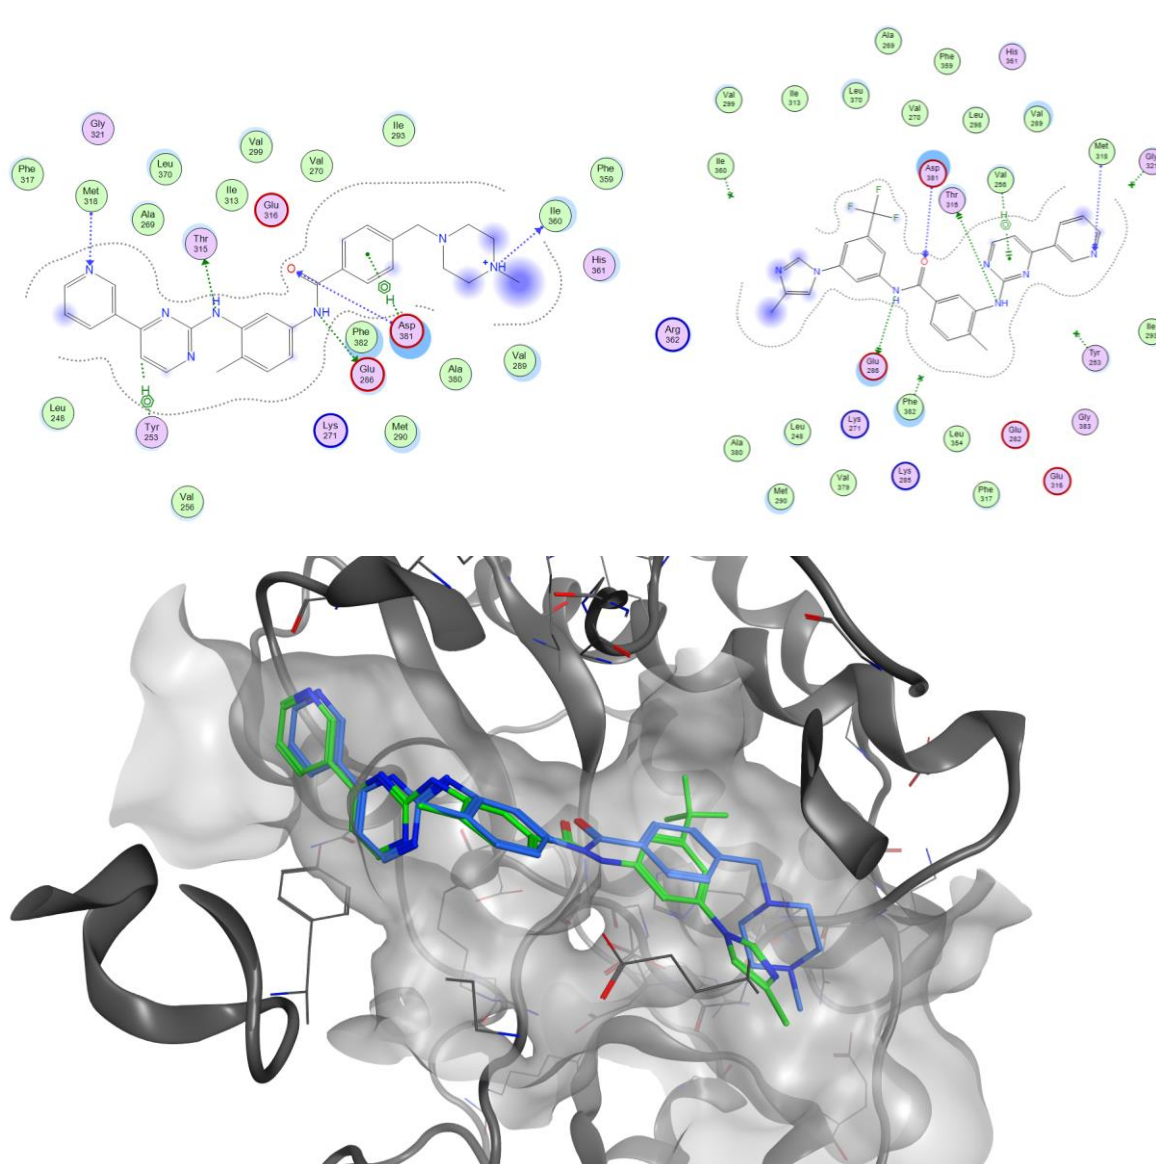

**Figure S24.** Up left) Imatinib 2D interaction with BCR-ABL kinase. Up right) Nilotinib 2D interactions with BCR-ABL kinase. Down) Docked poses of imatinib (blue) and nilotinib (green) inside the binding pocket of BCR-ABL kinase (PDB ID: 1IEP).

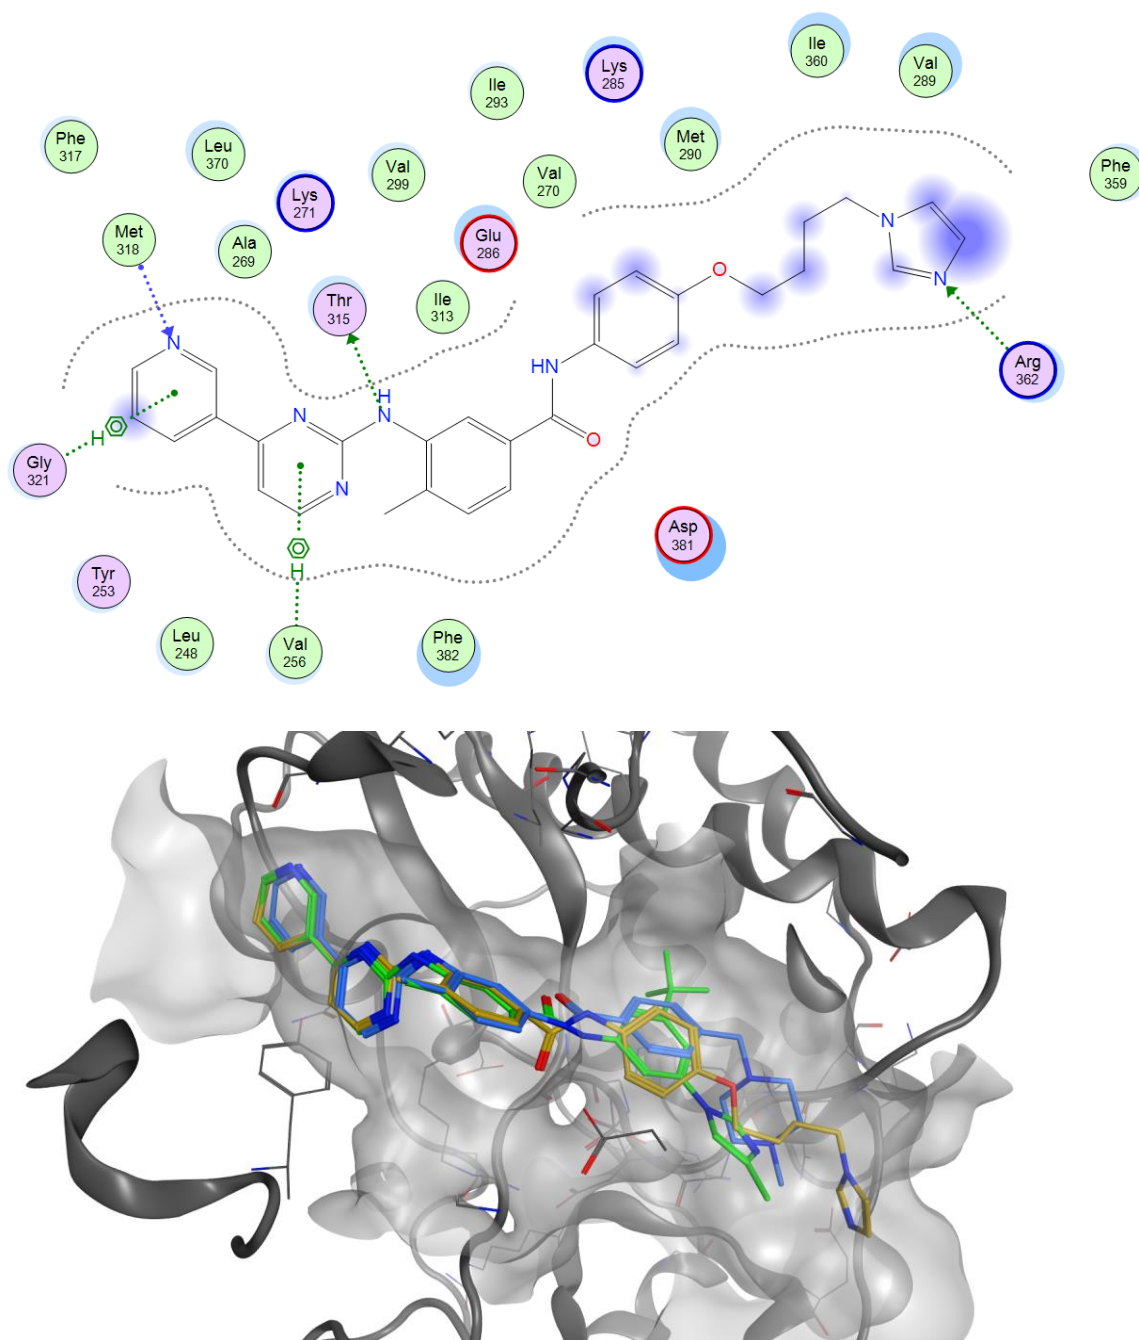

**Figure S25.** Up) **1a** 2D interaction with BCR-ABL kinase. Down) Docked poses of imatinib (blue), nilotinib (green) and **1a** (yellow) inside the binding pocket of BCR-ABL kinase (PDB ID: 1IEP).

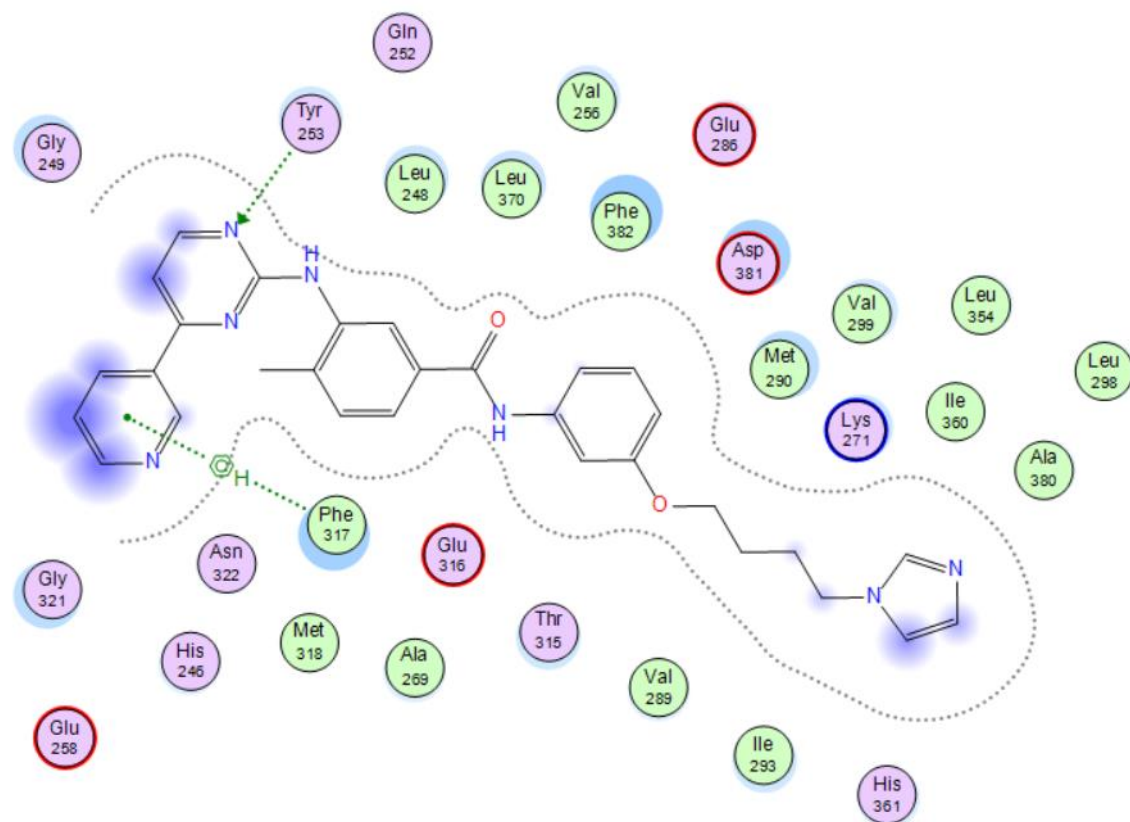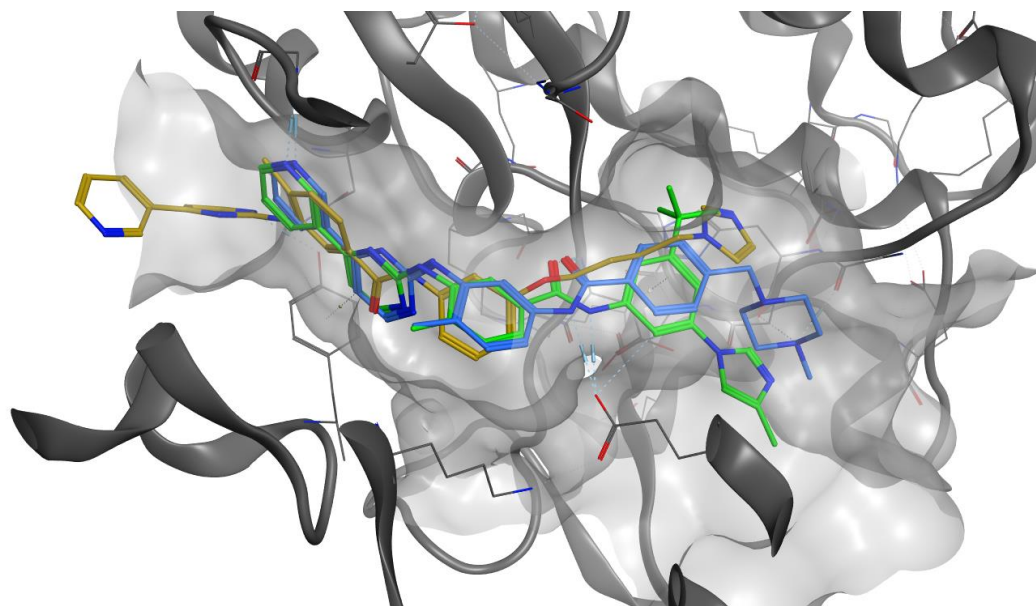

**Figure S26.** Up) **1b** 2D interaction with BCR-ABL kinase. Down) Docked poses of imatinib (blue), nilotinib (green) and **1b** (yellow) inside the binding pocket of BCR-ABL kinase (PDB ID: 1IEP).

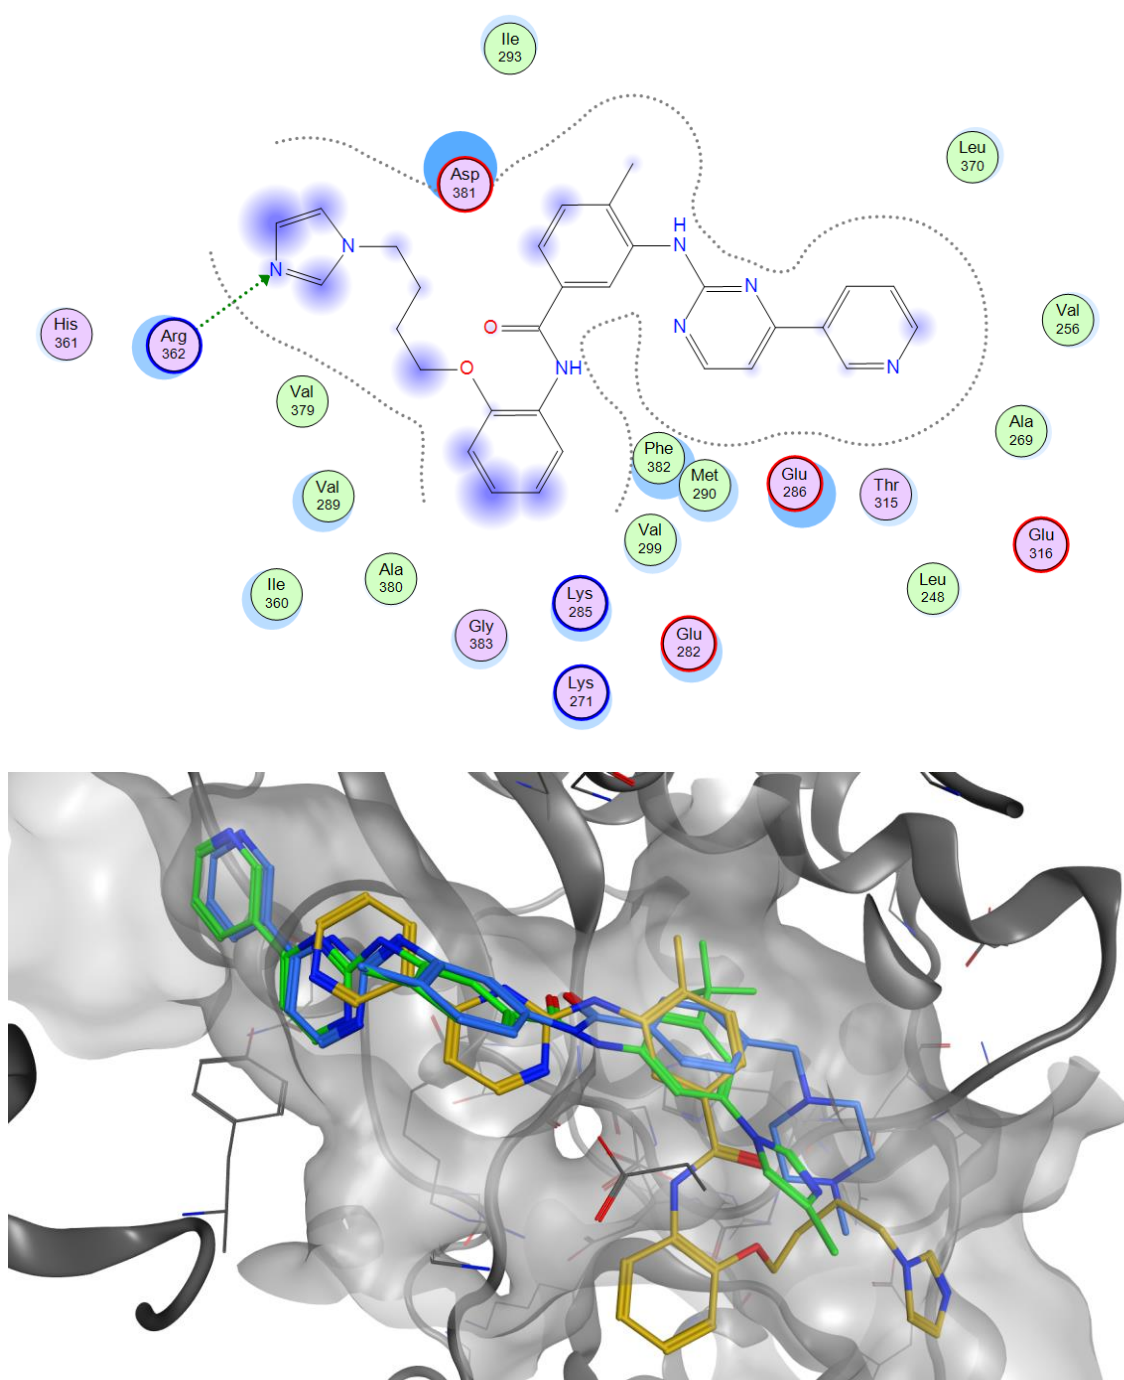

**Figure S27.** Up) **1c** 2D interaction with BCR-ABL kinase. Down) Docked poses of imatinib (blue), nilotinib (green) and **1c** (yellow) inside the binding pocket of BCR-ABL kinase (PDB ID: 1IEP).

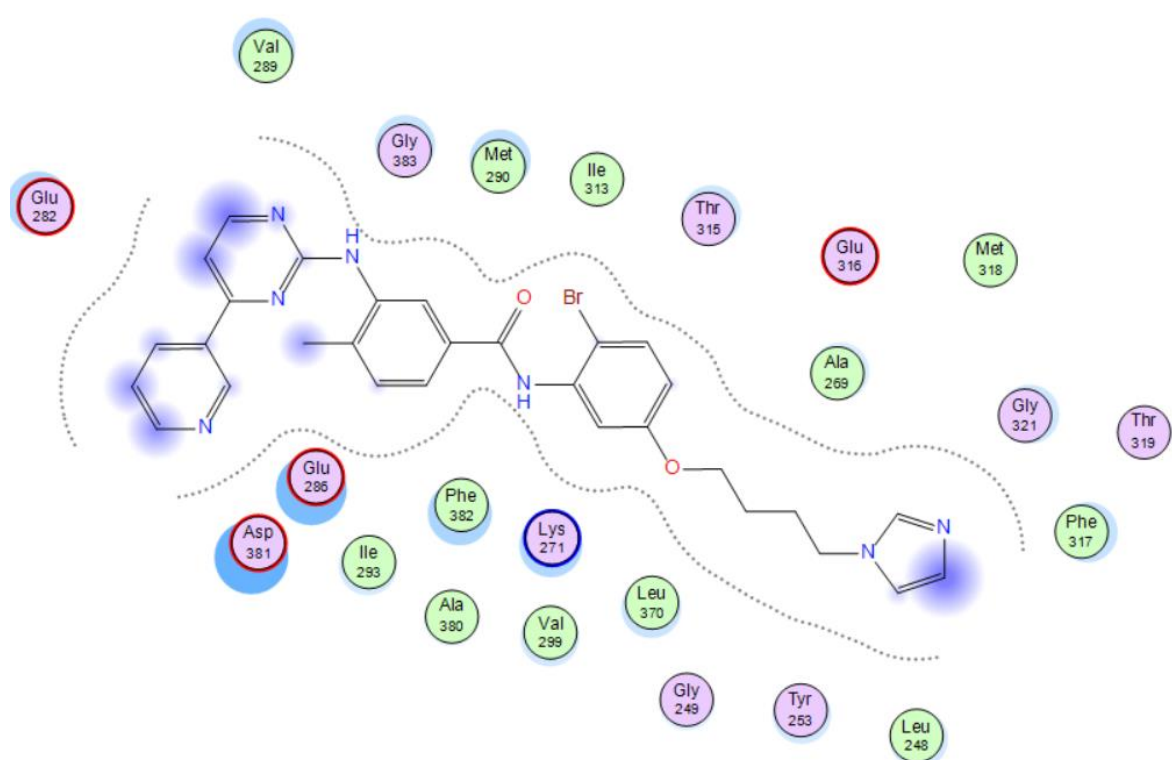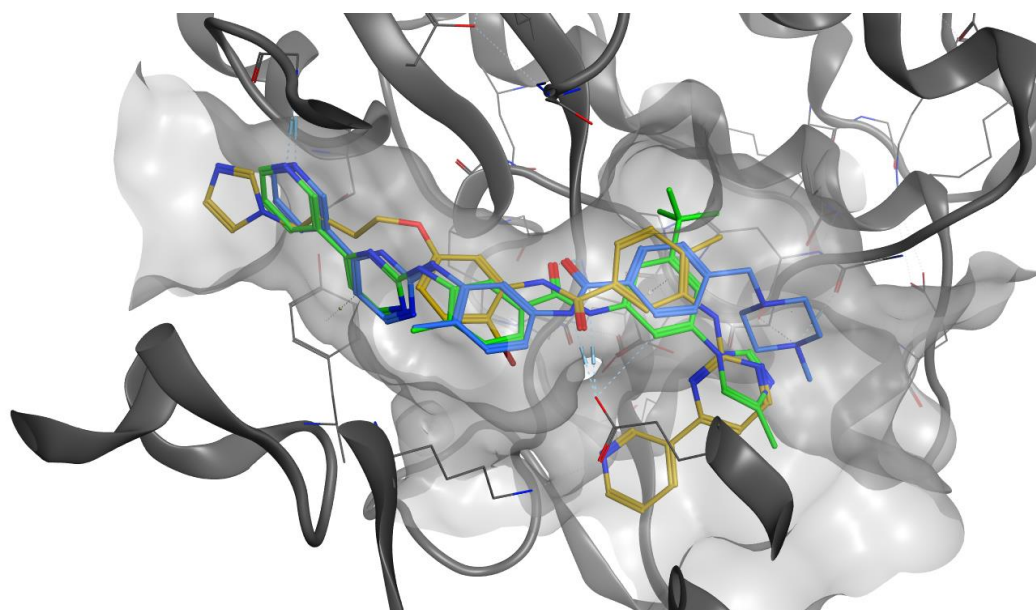

**Figure S28.** Up) **1d** 2D interaction with BCR-ABL kinase. Down) Docked poses of imatinib (blue), nilotinib (green) and **1d** (yellow) inside the binding pocket of BCR-ABL kinase (PDB ID: 1IEP).

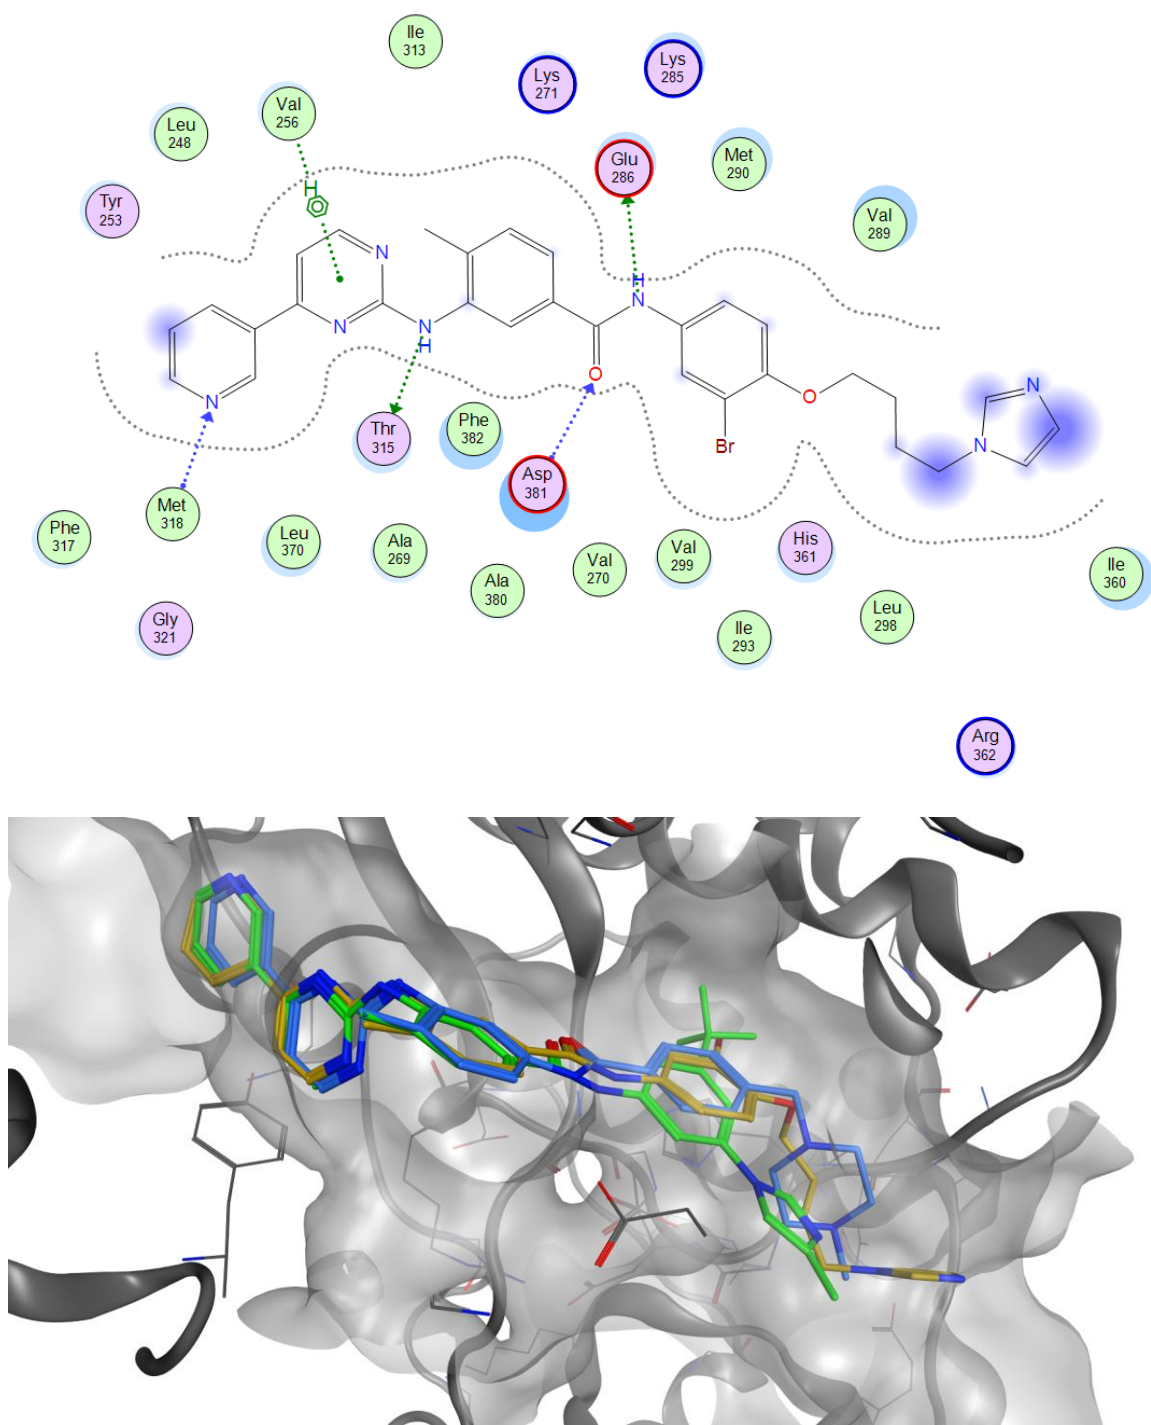

**Figure S29.** Up) **1e** 2D interaction with BCR-ABL kinase. Down) Docked poses of imatinib (blue), nilotinib (green) and **1e** (yellow) inside the binding pocket of BCR-ABL kinase (PDB ID: 1IEP).

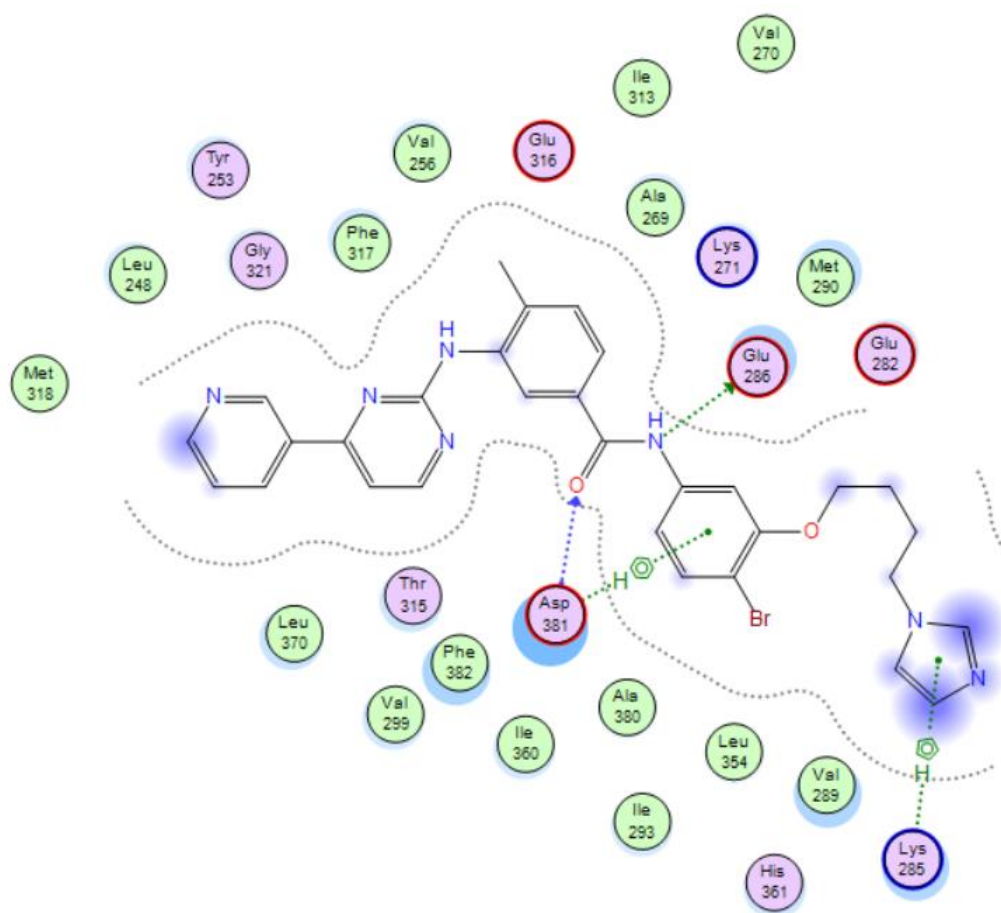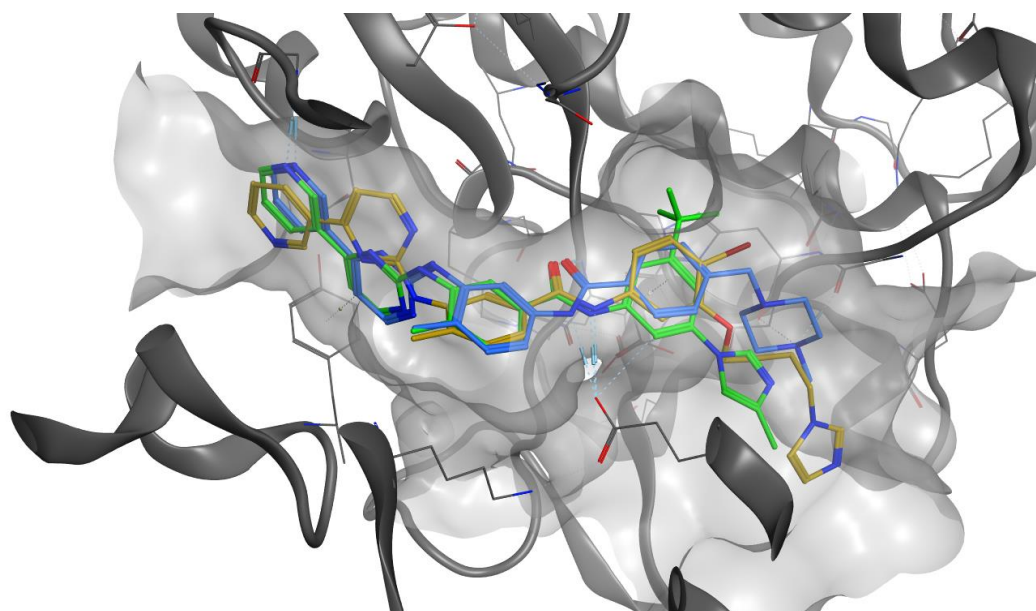

**Figure S30.** Up) **1f** 2D interaction with BCR-ABL kinase. Down) Docked poses of imatinib (blue), nilotinib (green), and **1f** (yellow) inside the binding pocket of BCR-ABL kinase (PDB ID: 1IEP). .

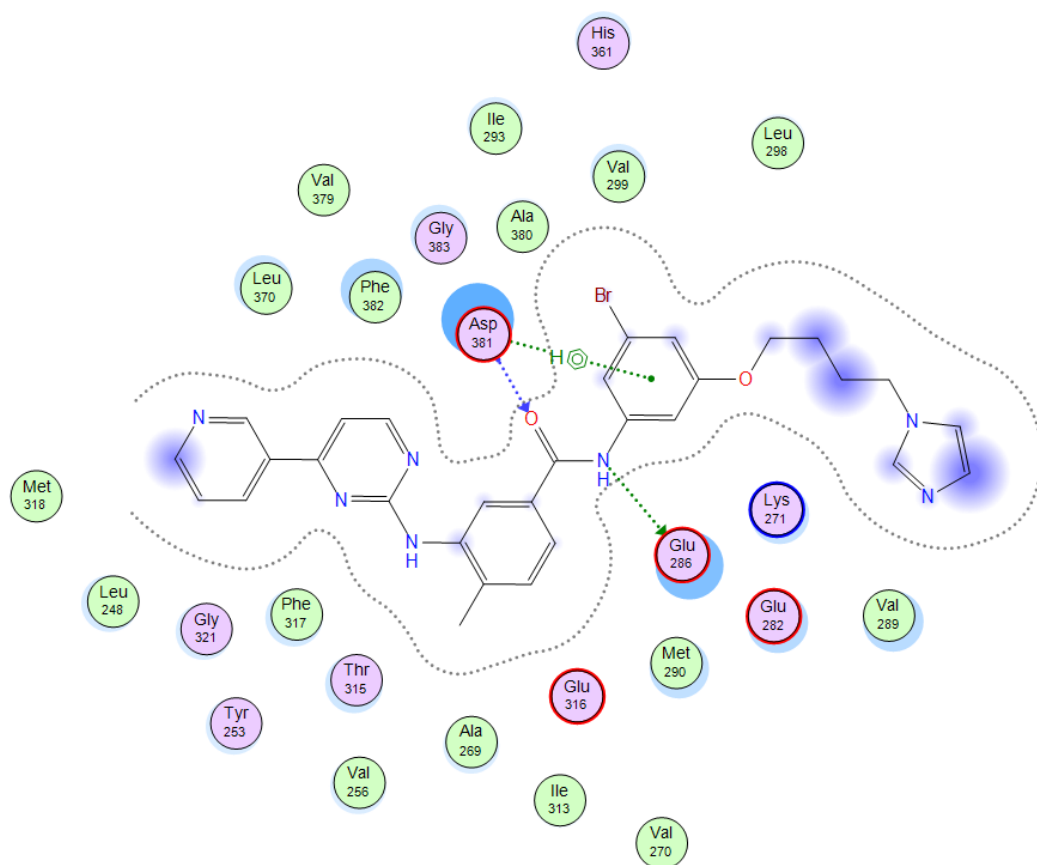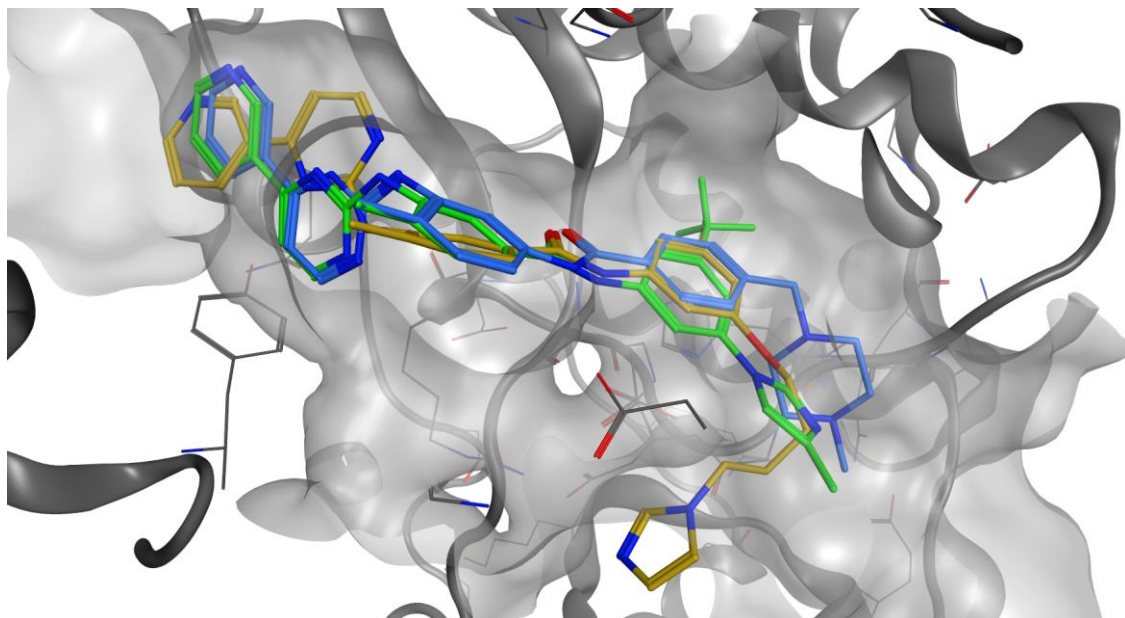

**Figure S31.** Up) **1g** 2D interaction with BCR-ABL kinase. Down) Docked poses of imatinib (blue), nilotinib (green), and **1g** (yellow) inside the binding pocket of BCR-ABL kinase (PDB ID: 1IEP).

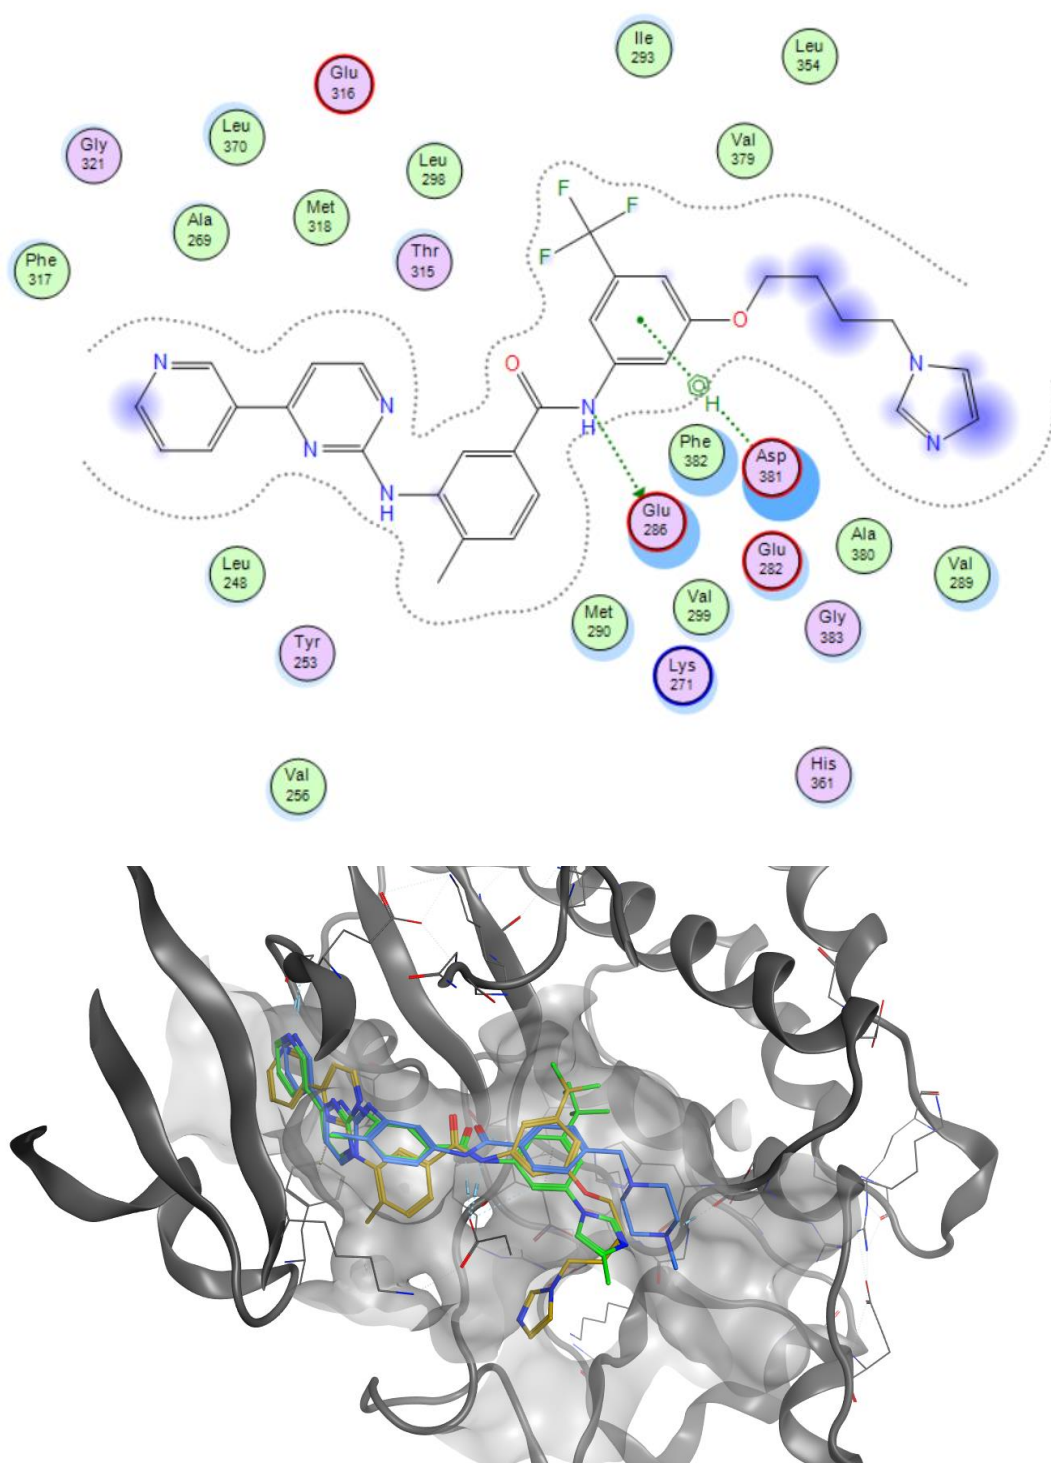

**Figure S32.** Up) **1h** 2D interaction with BCR-ABL kinase. Down) Docked poses of imatinib (blue), nilotinib (green), and **1h** (yellow) inside the binding pocket of BCR-ABL kinase (PDB ID: 1IEP).

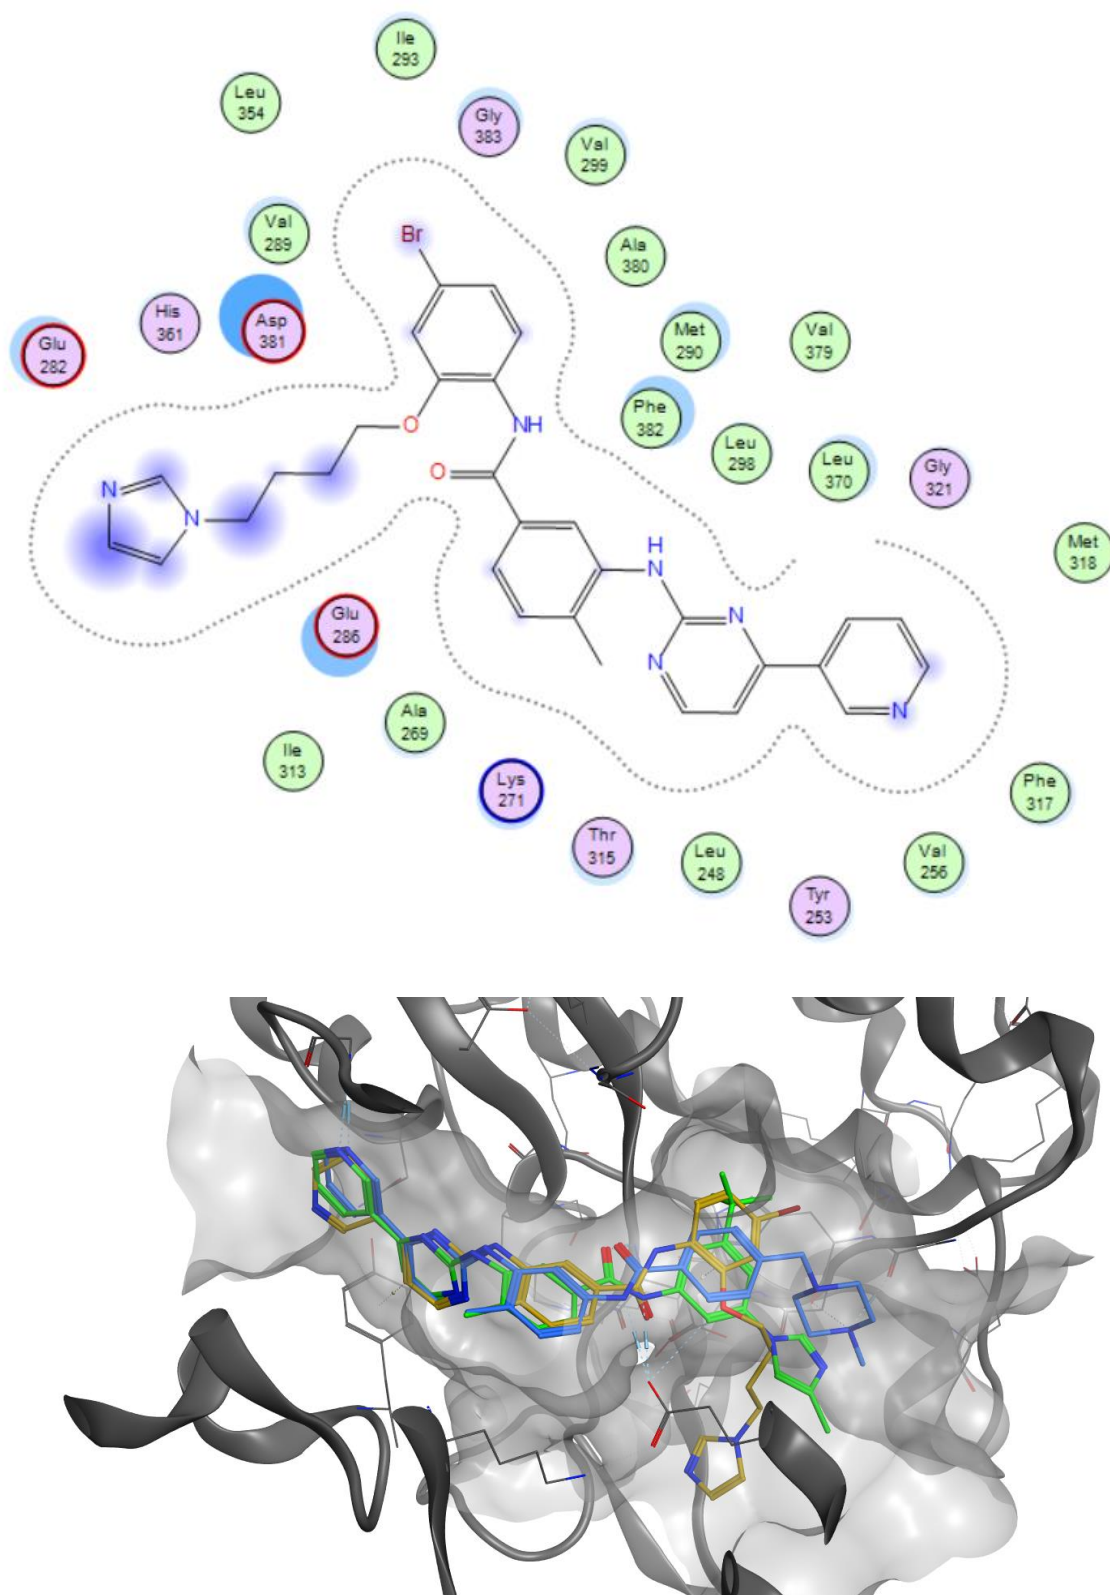

**Figure S33.** Up) **1i** 2D interaction with BCR-ABL kinase. Down) Docked poses of imatinib (blue), nilotinib (green), and **1i** (yellow) inside the binding pocket of BCR-ABL kinase (PDB ID: 1IEP).

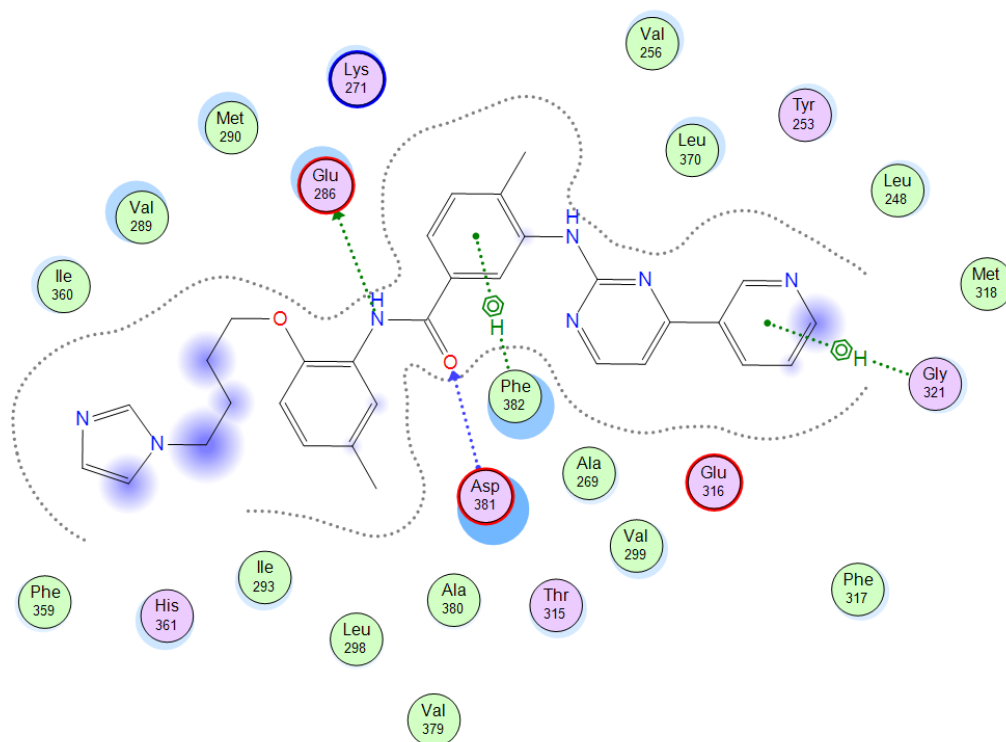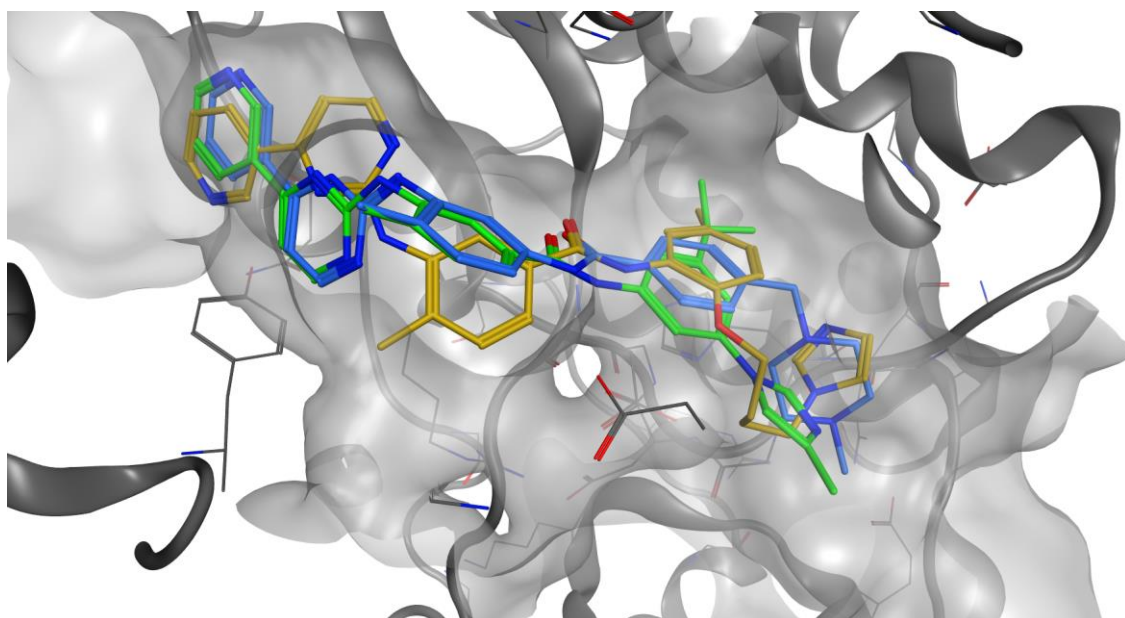

**Figure S34.** Up) **1j** 2D interaction with BCR-ABL kinase. Down) Docked poses of imatinib (blue), nilotinib (green) and **1j** (yellow) inside the binding pocket of BCR-ABL kinase (PDB ID: 1IEP).

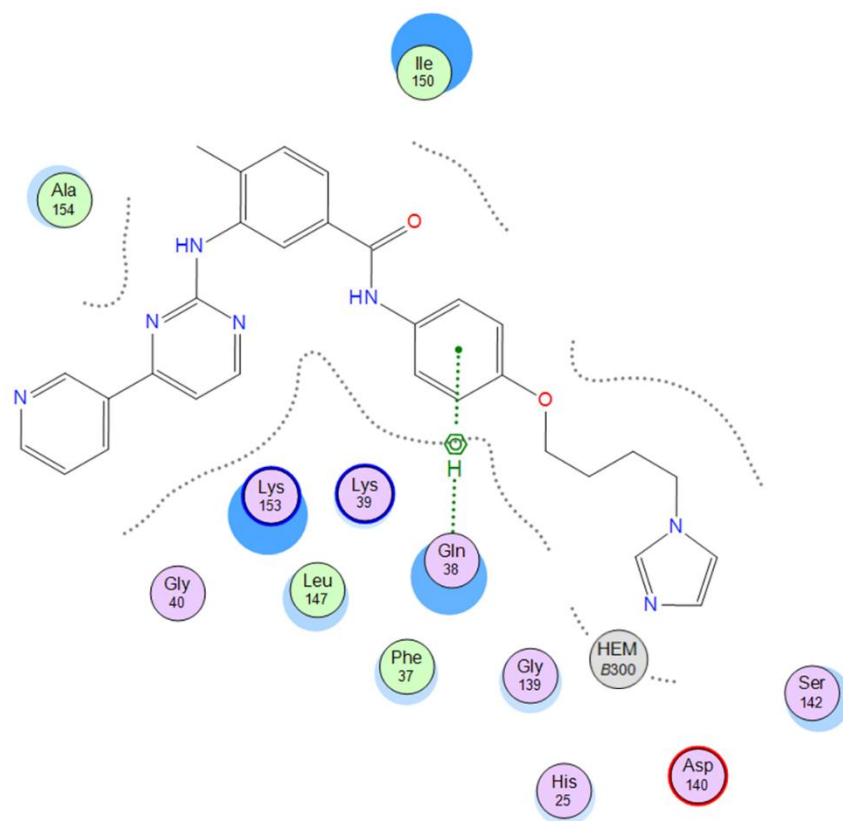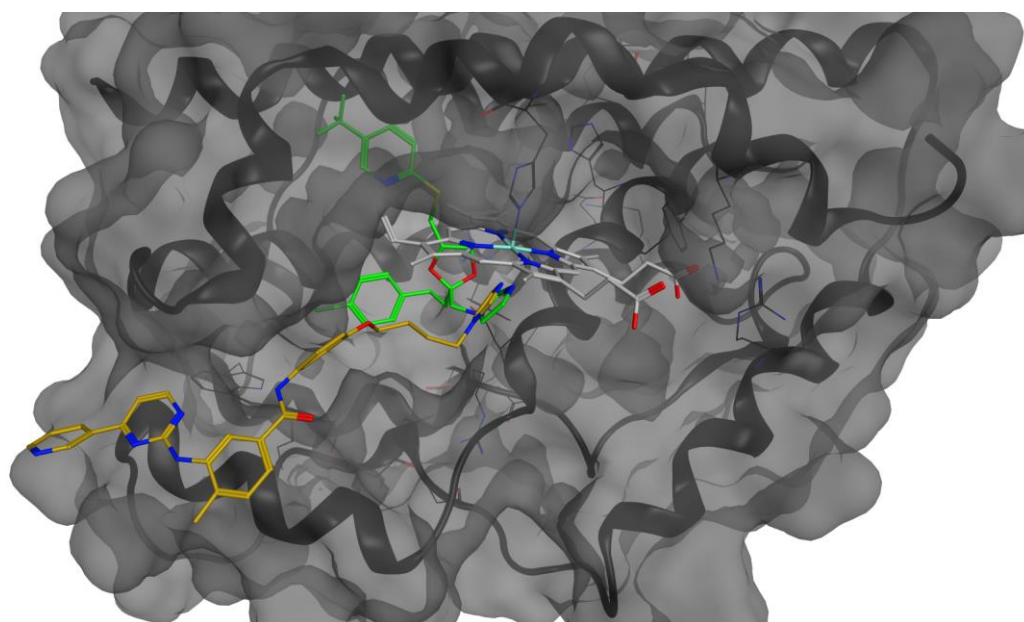

**Figure S35.** Up) **1a** 2D interaction with HO-1. Down) Docked poses of QC-80 (green) and **1a** (yellow) inside the binding pocket of HO-1 (PDB ID: 3HOK).

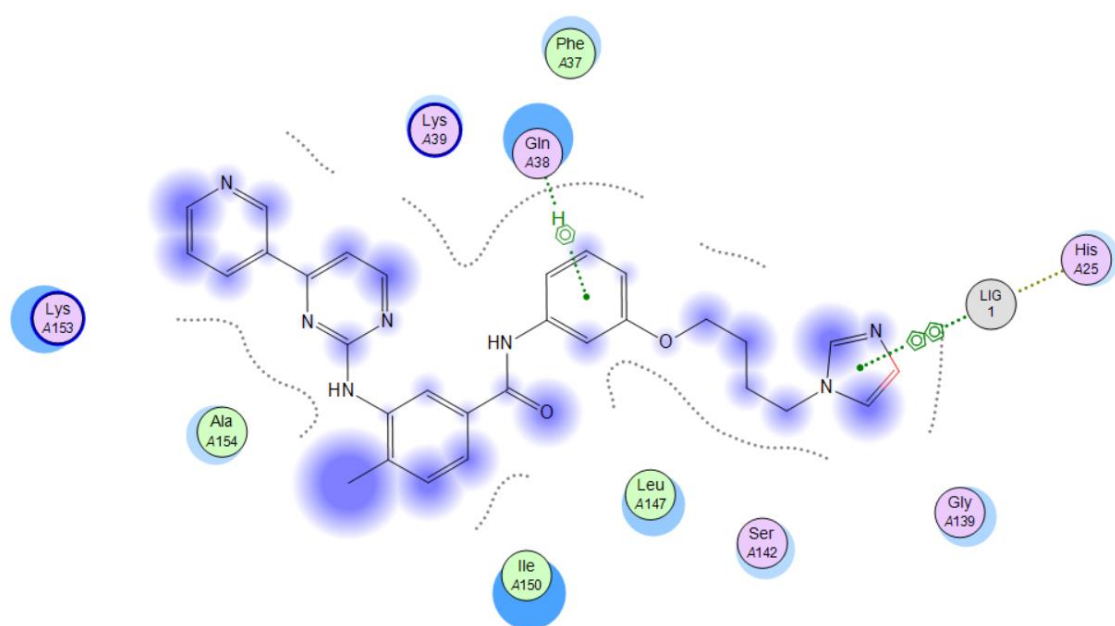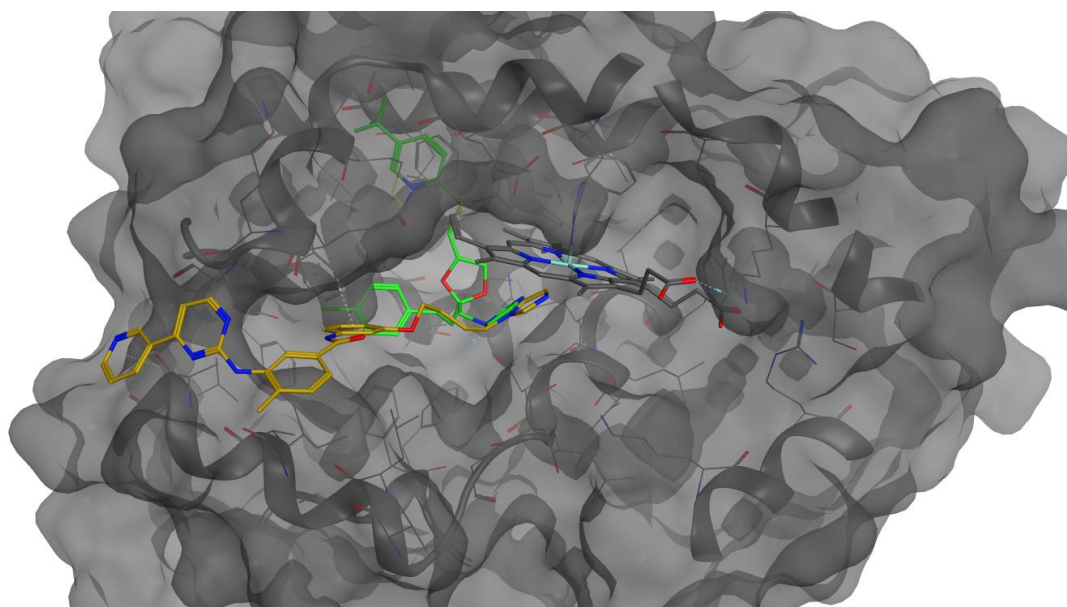

**Figure S36.** Up) **1b** 2D interaction with HO-1. Down) Docked poses of QC-80 (green) and **1b** (yellow) inside the binding pocket of HO-1 (PDB ID: 3HOK).

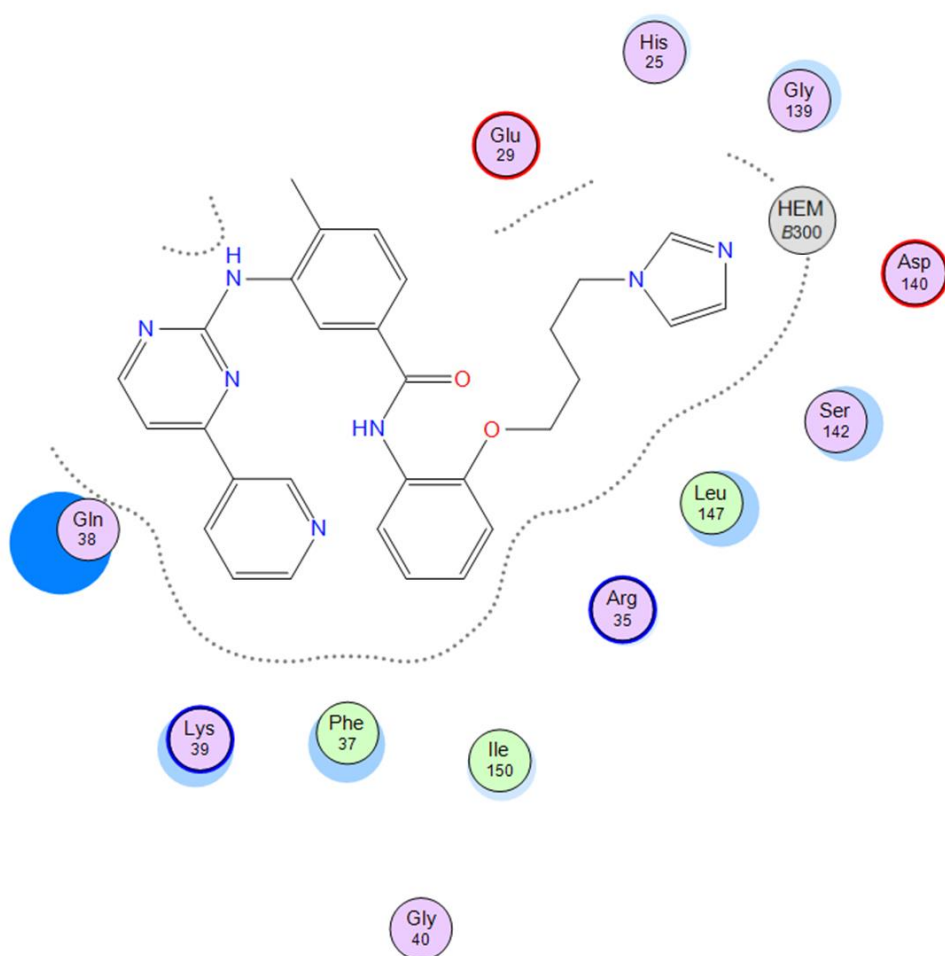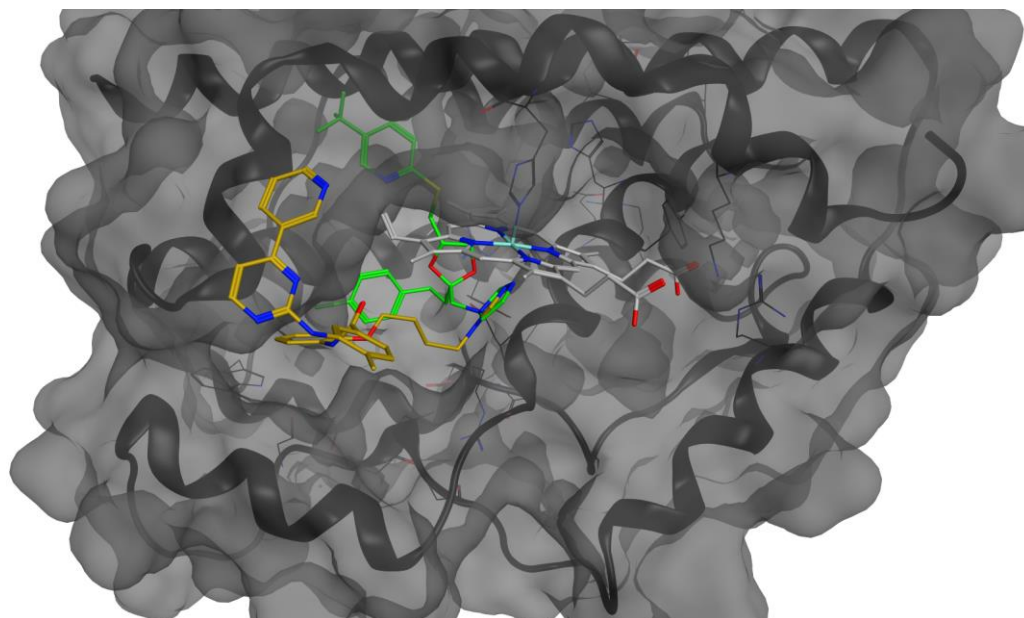

**Figure S37.** Up) **1c** 2D interaction with HO-1. Down) Docked poses of QC-80 (green) and **1c** (yellow) inside the binding pocket of HO-1 (PDB ID: 3HOK).

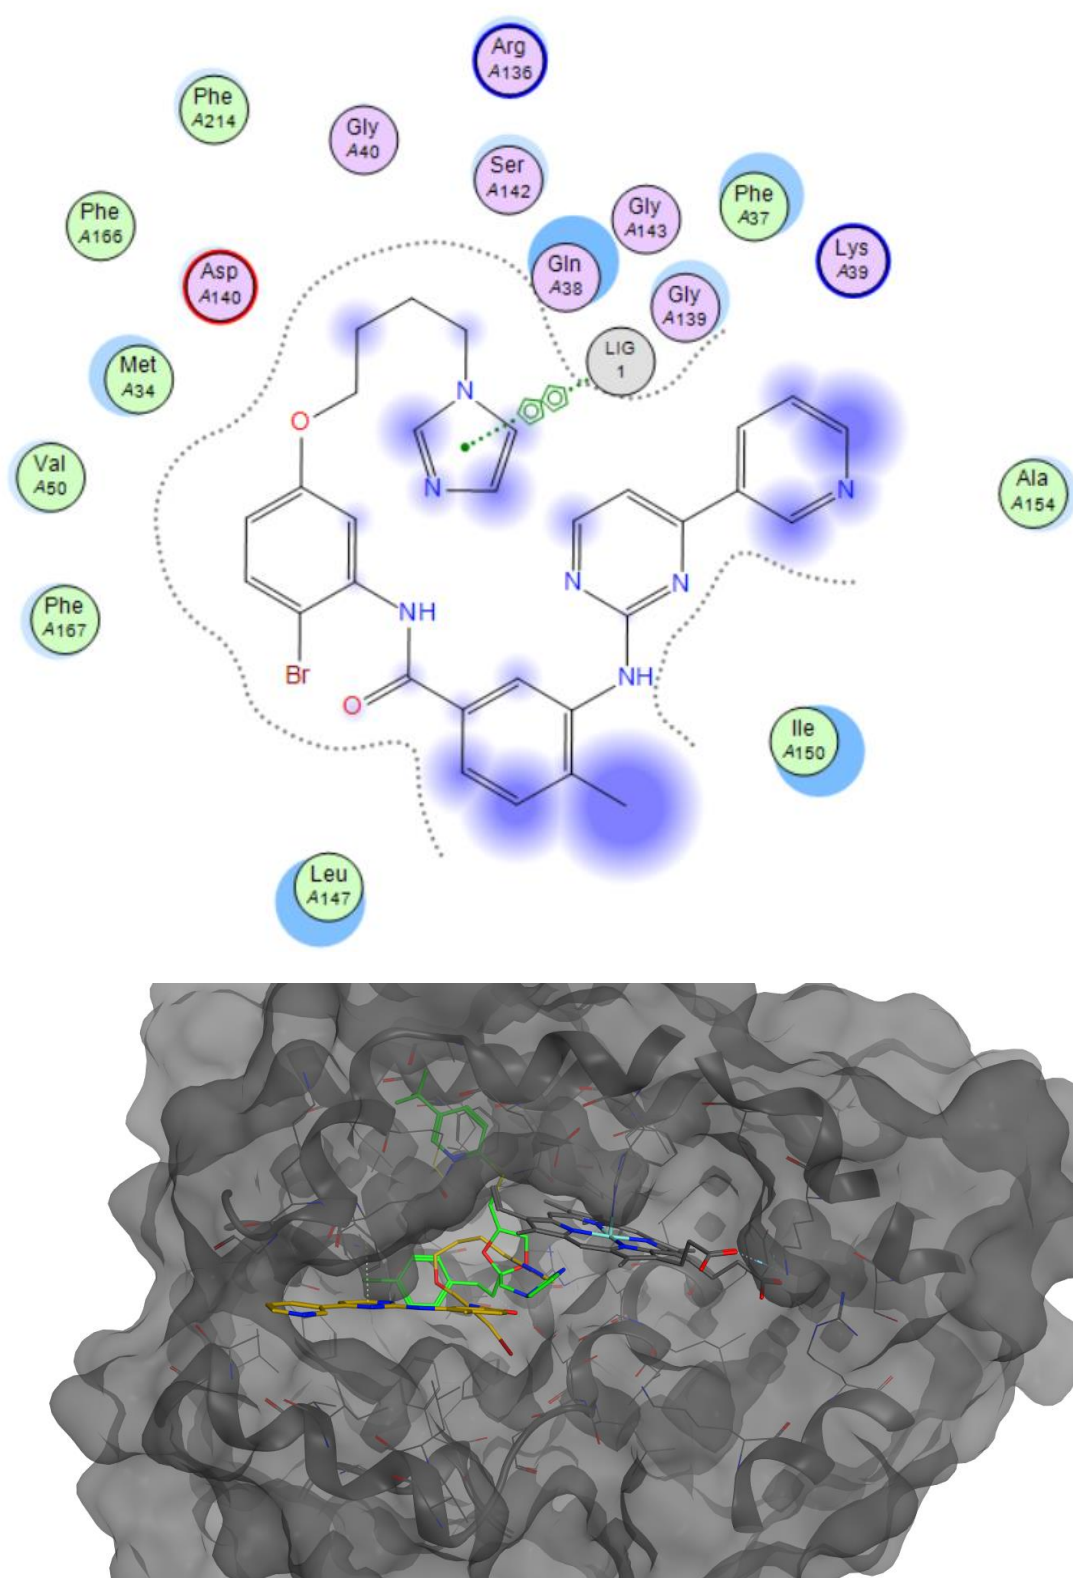

**Figure S38.** Up) **1d** 2D interaction with HO-1. Down) Docked poses of QC-80 (green) and **1d** (yellow) inside the binding pocket of HO-1 (PDB ID: 3HOK).

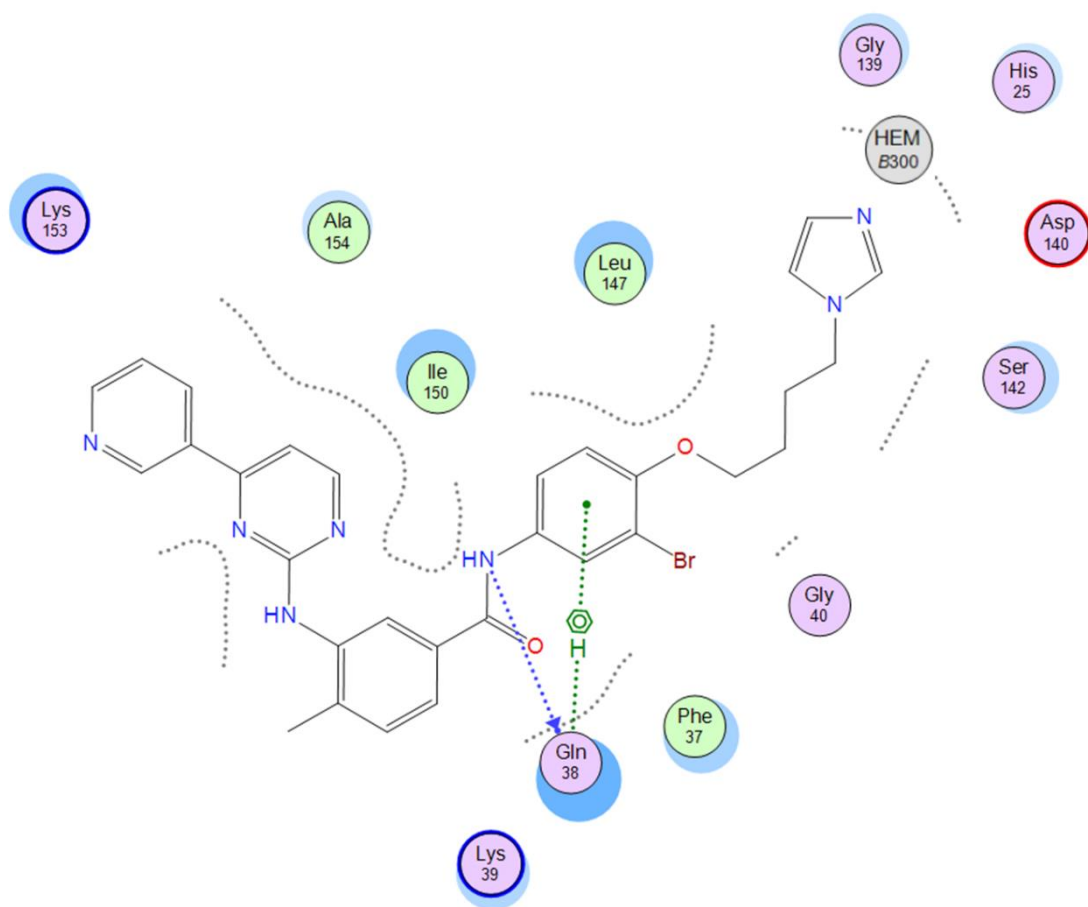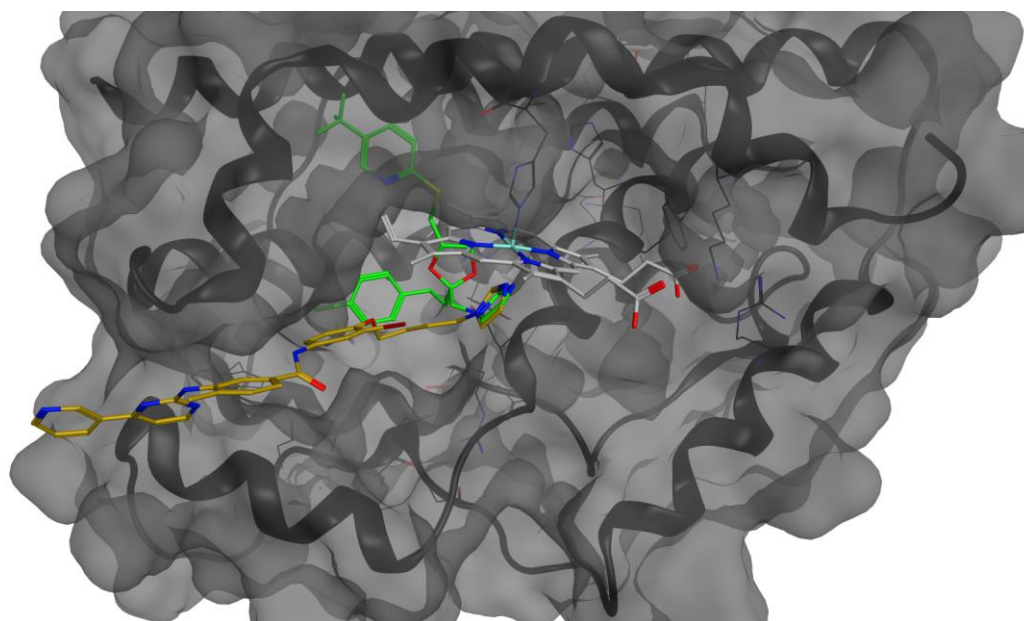

**Figure S39.** Up) **1e** 2D interaction with HO-1. Down) Docked poses of QC-80 (green) and **1e** (yellow) inside the binding pocket of HO-1 (PDB ID: 3HOK).

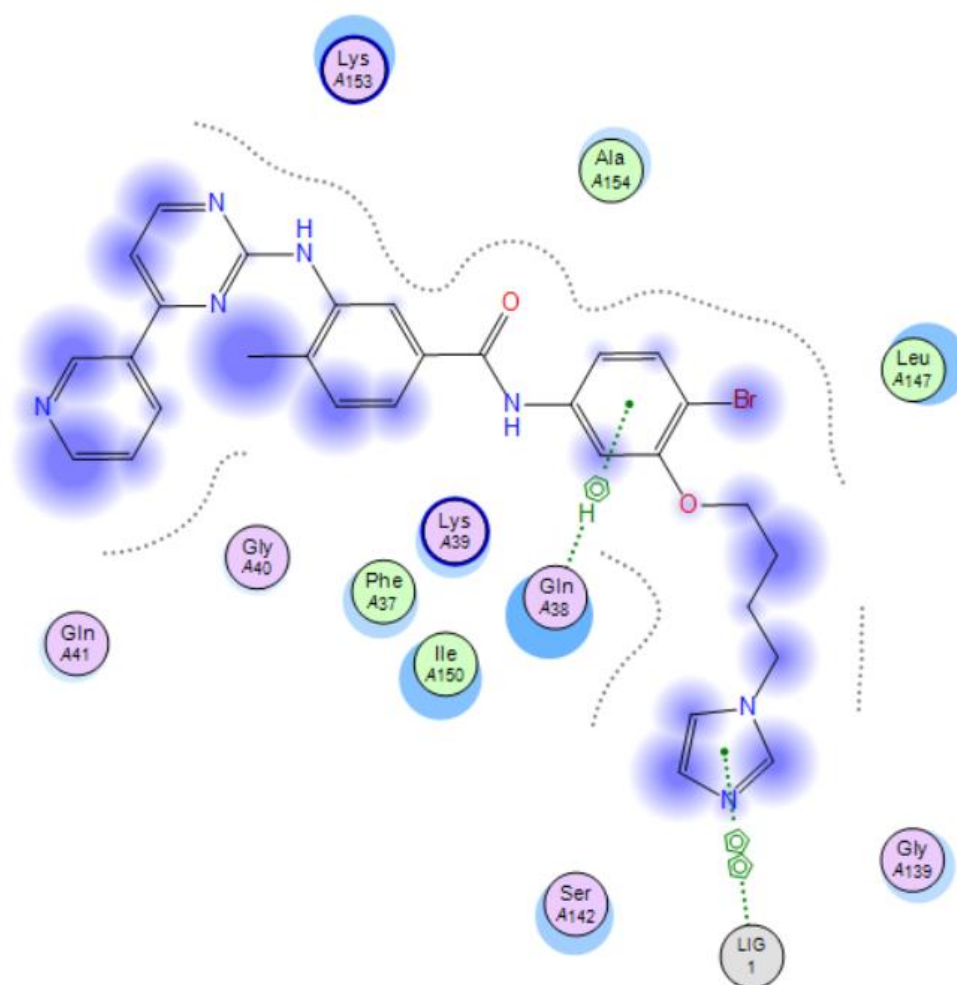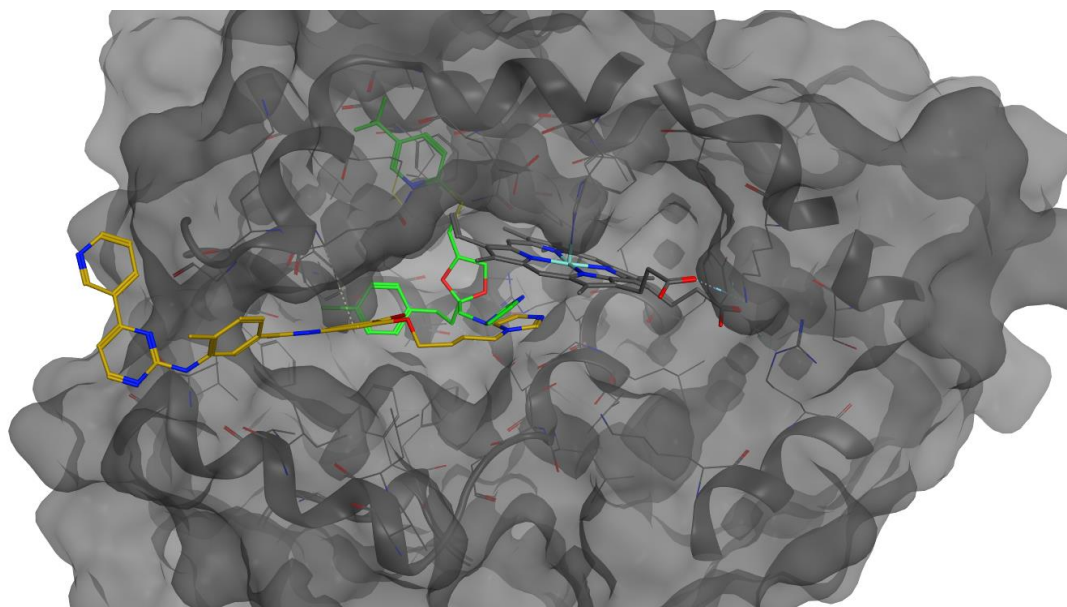

**Figure S40.** Up) **1f** 2D interaction with HO-1. Down) Docked poses of QC-80 (green) and **1f** (yellow) inside the binding pocket of HO-1 (PDB ID: 3HOK).

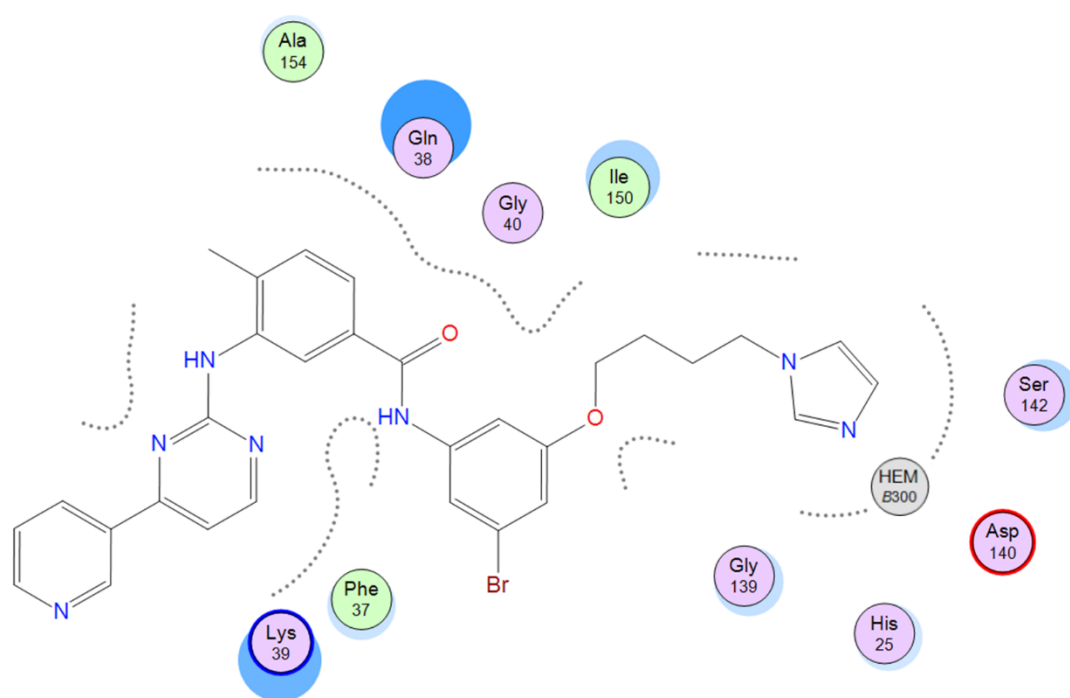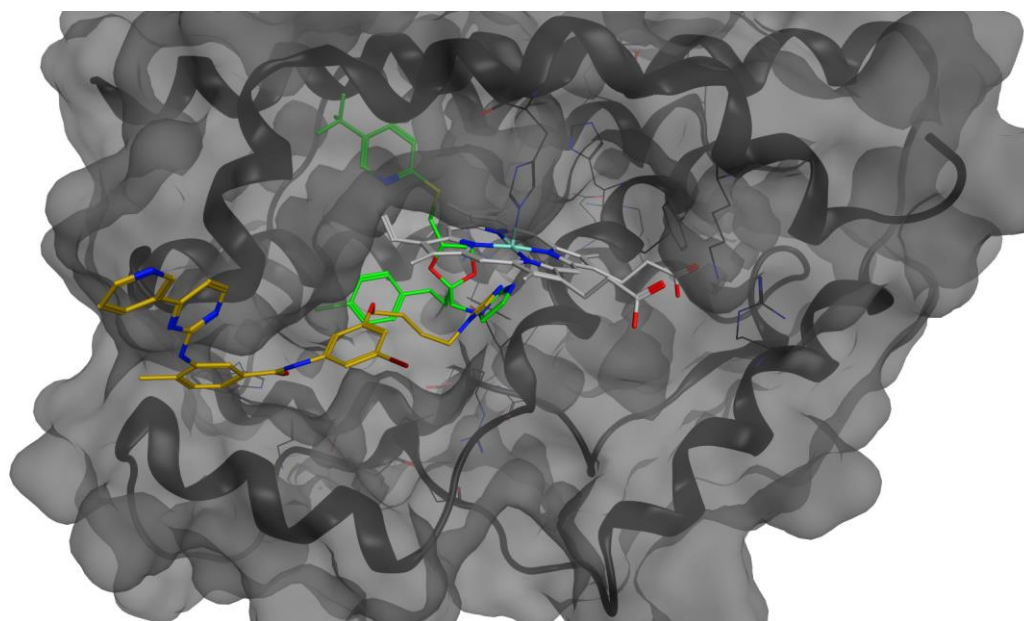

**Figure S41.** Up) **1g** 2D interaction with HO-1. Down) Docked poses of QC-80 (green) and **1g** (yellow) inside the binding pocket of HO-1 (PDB ID: 3HOK).

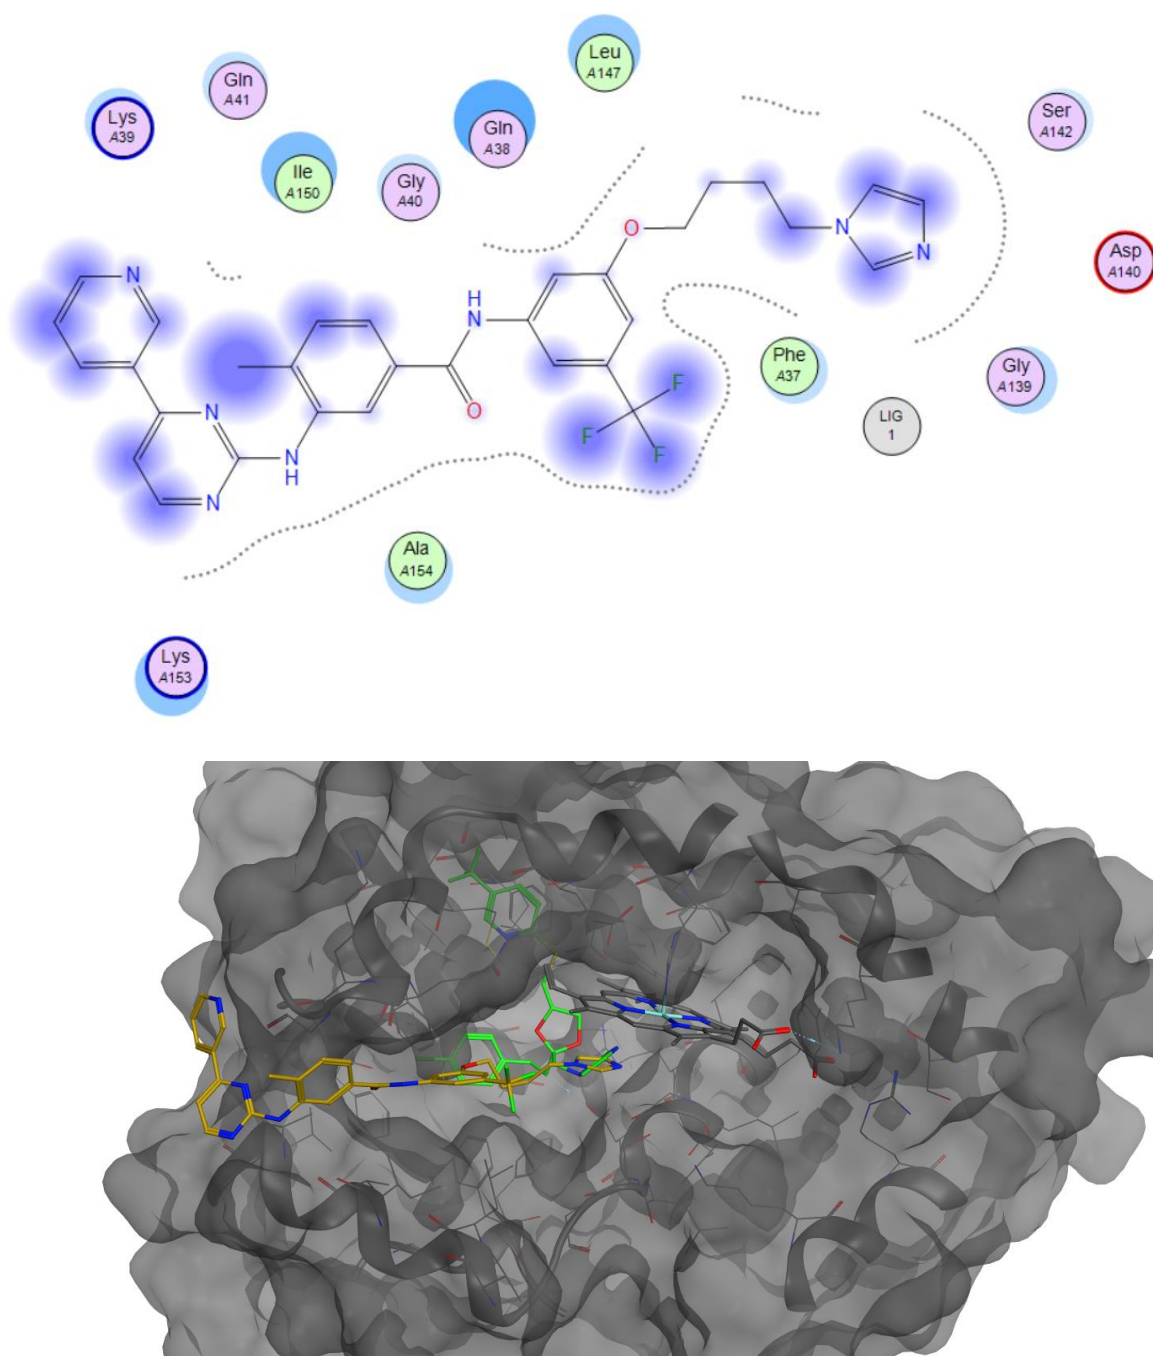

**Figure S42.** Up) **1h** 2D interaction with HO-1. Down) Docked poses of QC-80 (green) and **1h** (yellow) inside the binding pocket of HO-1 (PDB ID: 3HOK).



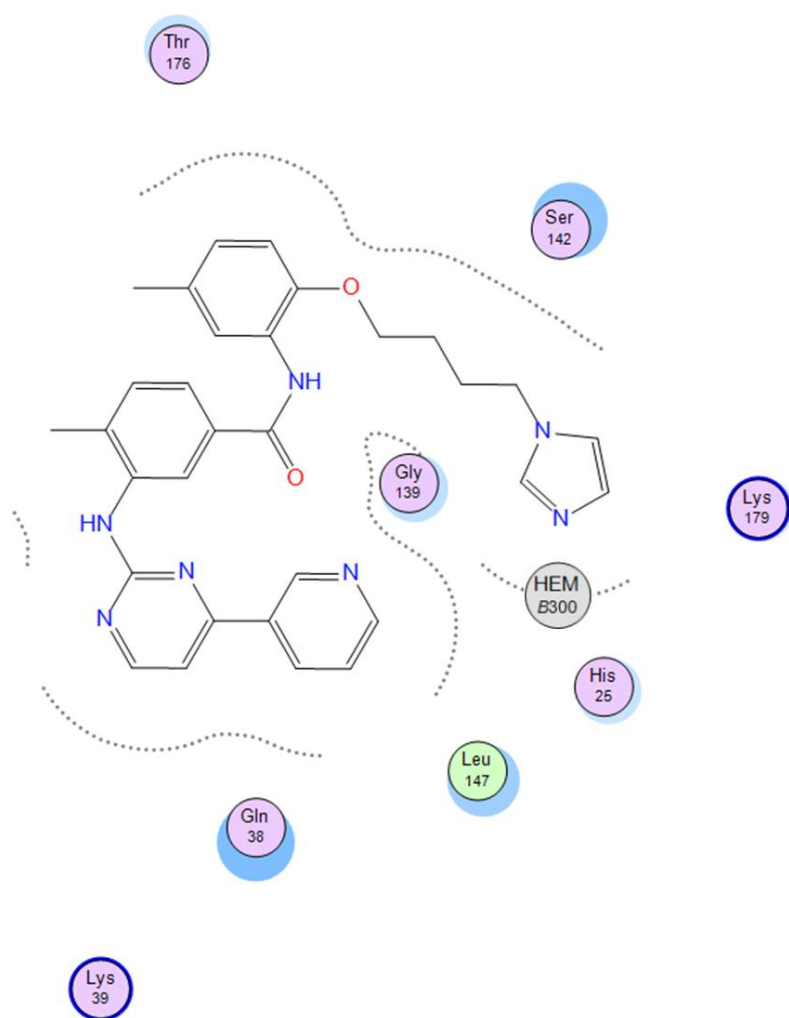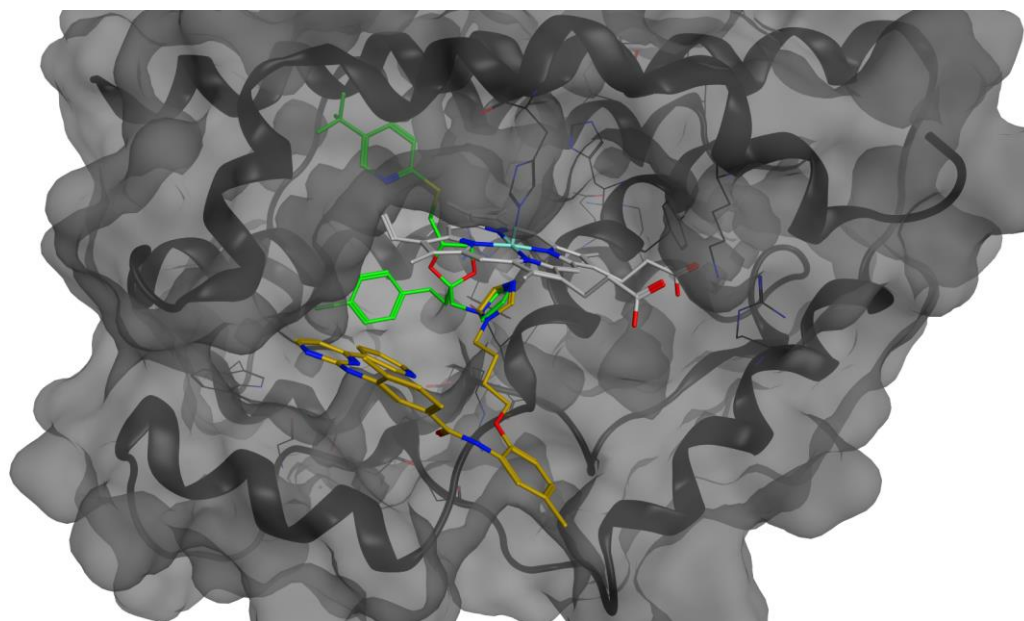

**Figure S44.** Up) **1j** 2D interaction with HO-1. Down) Docked poses of QC-80 (green) and **1j** (yellow) inside the binding pocket of HO-1 (PDB ID: 3HOK).
